# Supplementary material
Source: PubMed Central journal article supplement (PMC2888918)
Supplement: NIHMS131850-supplement-suppl.pdf [file NIHMS131850-supplement-suppl.pdf]

Supporting Information:

**Synthesis and Photophysical Properties of Sulfonamidophenyl Porphyrins as Models for  
Activatable Photosensitizers**

Jayeeta Bhaumik, Ralph Weissleder, and Jason R. McCarthy\*

Center for Molecular Imaging Research and Center for Systems Biology, Massachusetts General  
Hospital and Harvard Medical School, 149 13th Street, Rm 5406, Charlestown, MA 02129

E-mail: [jason\\_mccarthy@hms.harvard.edu](mailto:jason_mccarthy@hms.harvard.edu)

| <b>Table of Contents</b>                                             | <b>Page</b> |
|----------------------------------------------------------------------|-------------|
| 1. Comparison of NMR spectra of <b>2cSAM</b> and <b>2tSAM</b>        | S2          |
| 2. Extinction coefficients of the Soret band of <b>1-4</b>           | S2          |
| 3. Fluorescence activation with thiols                               | S2-S3       |
| 4. Experimental Section                                              | S4-S5       |
| 5. Spectral data ( <sup>1</sup> H NMR, <sup>13</sup> C NMR and HPLC) | S6-S38      |

## 1. Comparison of NMR spectra of 2cSAM and 2tSAM.

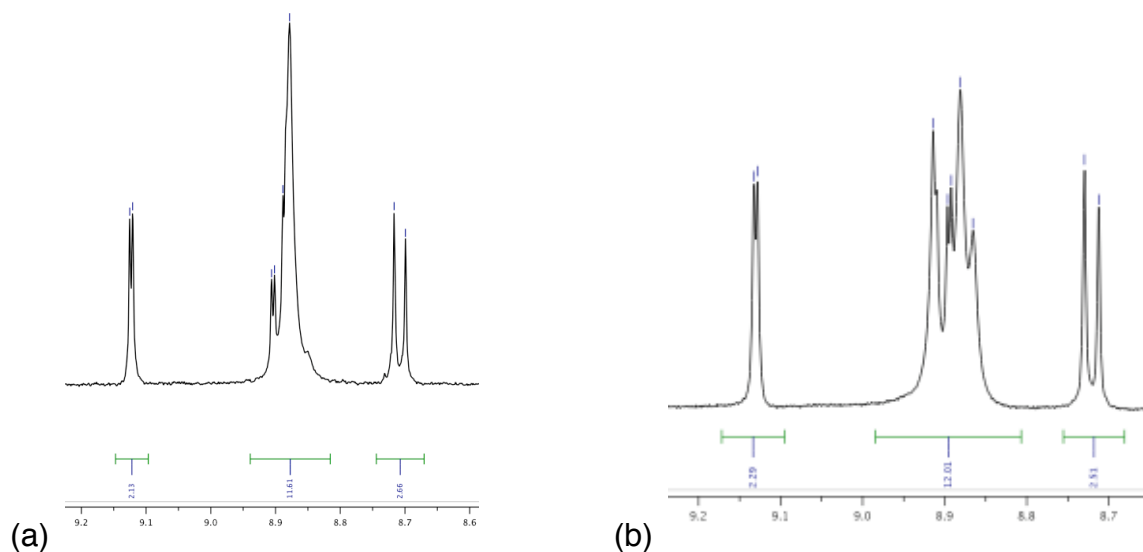

**Figure S1.** Expanded aromatic region showing pyrrolic  $\beta$  protons (a) **2cSAM**, (b) **2tSAM**.

## 2. Extinction coefficients of the Soret band of 1-4 in THF.

Table S1.

| Compound   | Soret (nm) | $\log \epsilon$ ( $\text{L mol}^{-1} \text{cm}^{-1}$ ) |
|------------|------------|--------------------------------------------------------|
| <b>TPP</b> | 417        | 5.6                                                    |
| <b>1</b>   | 418        | 5.3                                                    |
| <b>2c</b>  | 424        | 5.8                                                    |
| <b>2t</b>  | 424        | 5.3                                                    |
| <b>3</b>   | 432        | 5.4                                                    |
| <b>4</b>   | 434        | 5.4                                                    |

All spectra obtained in THF

## 3. Fluorescence activation of porphyrin 4SAM-mPEG with various thiols.

We have looked at the kinetics of some of the thiols [glutathione (GSH), thioglycolic acid (TGA), dithiothreitol (DTT) and L-cysteine (Cys)] in order to determine the rate of sulfonamide cleavage in an SPP (Figure S2). A solution of sulfonamidophenyl porphyrin **4SAM-mPEG** (1  $\mu\text{M}$ ) in DMF was treated with each of the thiol (1 mM, 1000 equiv) in HEPES buffer (DMF/HEPES 1:1, 2 mL,

pH = 7.4; resulting concentrations for porphyrin is 0.5  $\mu$ M and the analyte is 0.5 mM). Each solution of porphyrin 4SAM-mPEG was then excited at 437 nm while monitoring maximum change in the fluorescence intensity at 686 nm over time (min). All the thio-mediated cleavage experiments were performed in triplicates. Among the thiols cysteine seemed to be the fastest, whereas glutathione seemed to be the slowest to cleave off the sulfonamide bond present in porphyrin 4SAM-mPEG. Other two thiols (TGA and DTT) seemed to be moderate to sulfonamide cleavage. Hence, depending upon the thiol substrate the rate of sulfonamide cleavage in porphyrins can vary drastically.

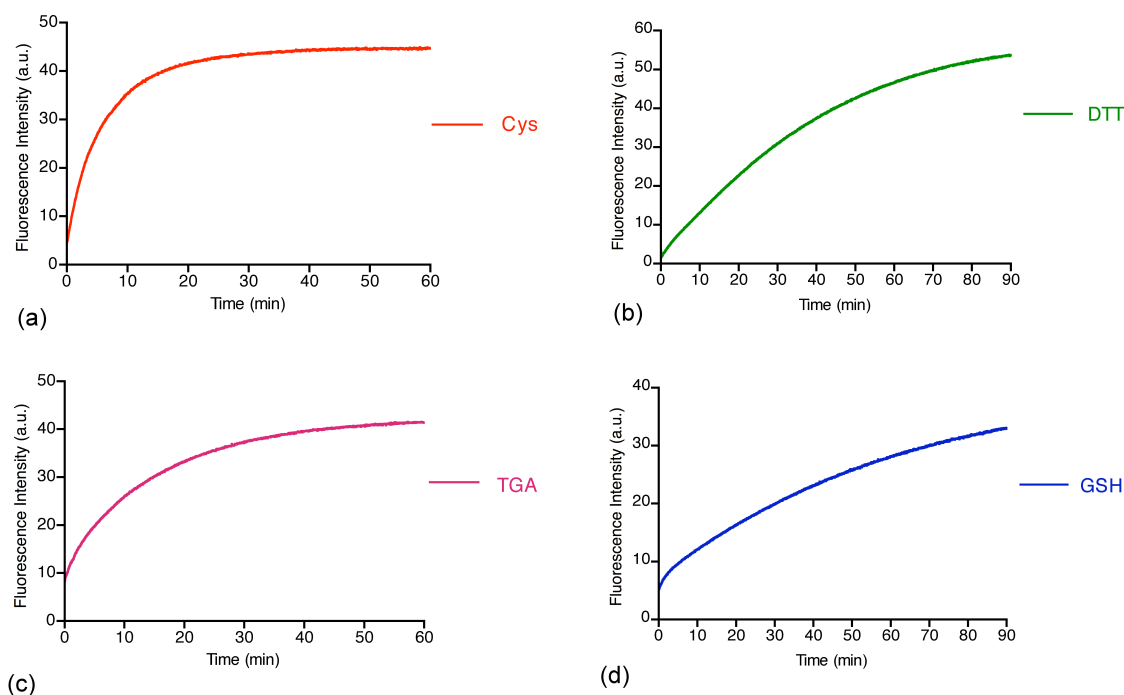

**Figure S2.** Change in fluorescence intensity upon treatment of porphyrin 4SAM-mPEG ( $\lambda_{\text{ex}} = 437$  nm,  $\lambda_{\text{em}} = 686$  nm) with different thiols (a) Cysteine (Cys), (b) Dithiothreitol (DTT), (c) Thioglycolic acid (TGA) and (d) Glutathione reduced (GSH).

#### 4. Experimental section

**General.** All chemicals and solvents were purchased from chemical companies and were used as received without further purification.  $\text{CHCl}_3$  was stabilized with 0.8% ethanol. Anhydrous acetone,  $\text{CH}_2\text{Cl}_2$  and  $\text{CHCl}_3$  (stabilized with 0.8% EtOH) were reagent grade and were used as received. Silica gel (40  $\mu\text{m}$  average particle size) was used for column chromatography. Absorption and fluorescence spectra were collected in DMF at room temperature unless noted otherwise. LCMS data were collected on a HPLC equipped with a diode array detector, a ESI-MS module, and a RPC18 column at a flow rate of 0.3 mL/min. High performance liquid chromatography (HPLC) data were collected from an instrument equipped with a diode array detector set to detect at 420 nm, and a fraction collector. Gradients were run with buffer A ( $\text{H}_2\text{O}/0.1\%$  trifluoroacetic acid (TFA)) and buffer B (90% acetonitrile/10%  $\text{H}_2\text{O}/0.1\%$  TFA). For analytical HPLC a C-18 reverse phase column was used with dimensions of 250 mm x 4.6 mm. For semi-preparative HPLC a C-18 reverse phase column was used with dimensions of 250 mm x 21.2 mm. Microwave-assisted syntheses were carried out on a CEM Discover microwave instrument. High-resolution electrospray ionization (ESI) mass spectra were obtained from a Fourier transform ion cyclotron resonance spectrometer (FT-ICR-MS) in the Department of Chemistry Instrumentation Facility (DCIF) at the Massachusetts Institute of Technology. All  $^1\text{H}$  NMR spectra (500 MHz) and  $^{13}\text{C}$  NMR spectra (125 MHz) were collected at the Department of Chemistry, University of Connecticut, in DMF unless noted otherwise. Non-commercial compounds, PEG<sub>3</sub>-bromoacetate,<sup>1</sup> porphyrins **1**, **2**, **3**,<sup>2</sup> **4**,<sup>3</sup> and TPP<sup>4</sup> were prepared according to literature procedures. Fluorescence quantum yields were calculated using TPP as standard as described previously.<sup>5</sup>

#### Singlet oxygen quantum yields.

Singlet oxygen quantum yields were calculated as previously described.<sup>5</sup> Stock solution of the respective porphyrins were made up in air-saturated DMF with optical densities equal to 0.3 at 650 nm.

Additionally a stock solution of 1,3-diphenylisobenzofuran (DPBF, 0.25 M in DMF) was mixed. All solutions were kept in the dark. To a fluorescence cuvette was added 2.0 mL of the porphyrin solution and 5  $\mu$ L of the DPBF solution, which was allowed to mix. The solution was irradiated with a laser (BW Tec) at 650 nm (60 mW) while stirring. After 10 s irradiation, the laser was shut off, and the fluorescence of the probe molecule was measured (excitation 471 nm, emission 495 nm). Singlet oxygen quantum yields were then calculated from the initial slope of the fluorescence intensity decrease per time, utilizing the following equation:

$$\Phi_{\Delta}(U) = \Phi_{\Delta}(St) \times \frac{S(U)}{S(St)}$$

where U and St denote unknown and standard, and S represents the slope. **TPP** was used as the standard.

### **Kinetic experiments.**

(i) A solution of each of the SPP (0.5  $\mu$ M) in DMF was treated with a large excess of thioglycolic acid (2.5 mM, 500 equiv), and the kinetics was examined by monitoring the fluorescence intensity increase over time at the excitation and emission maxima of each resulting aminophenylporphyrin.

(ii) A solution of sulfonamidophenyl porphyrin 4SAM-mPEG (1  $\mu$ M) in DMF and each of the analyte (1 mM, 1000 equiv) in HEPES buffer (pH = 7.4) were incubated at 37  $^{\circ}$ C for 15 min in DMF/HEPES (1:1, 2 mL, pH = 7.4; resulting concentrations for porphyrin is 0.5  $\mu$ M and the analyte is 0.5 mM). Each solution of porphyrin 4SAM-mPEG was then excited at 437 nm while monitoring the fluorescence intensity 686 nm.

### **5. Spectral data**

Solvent gradients utilized for analyses noted below HPLC spectra.

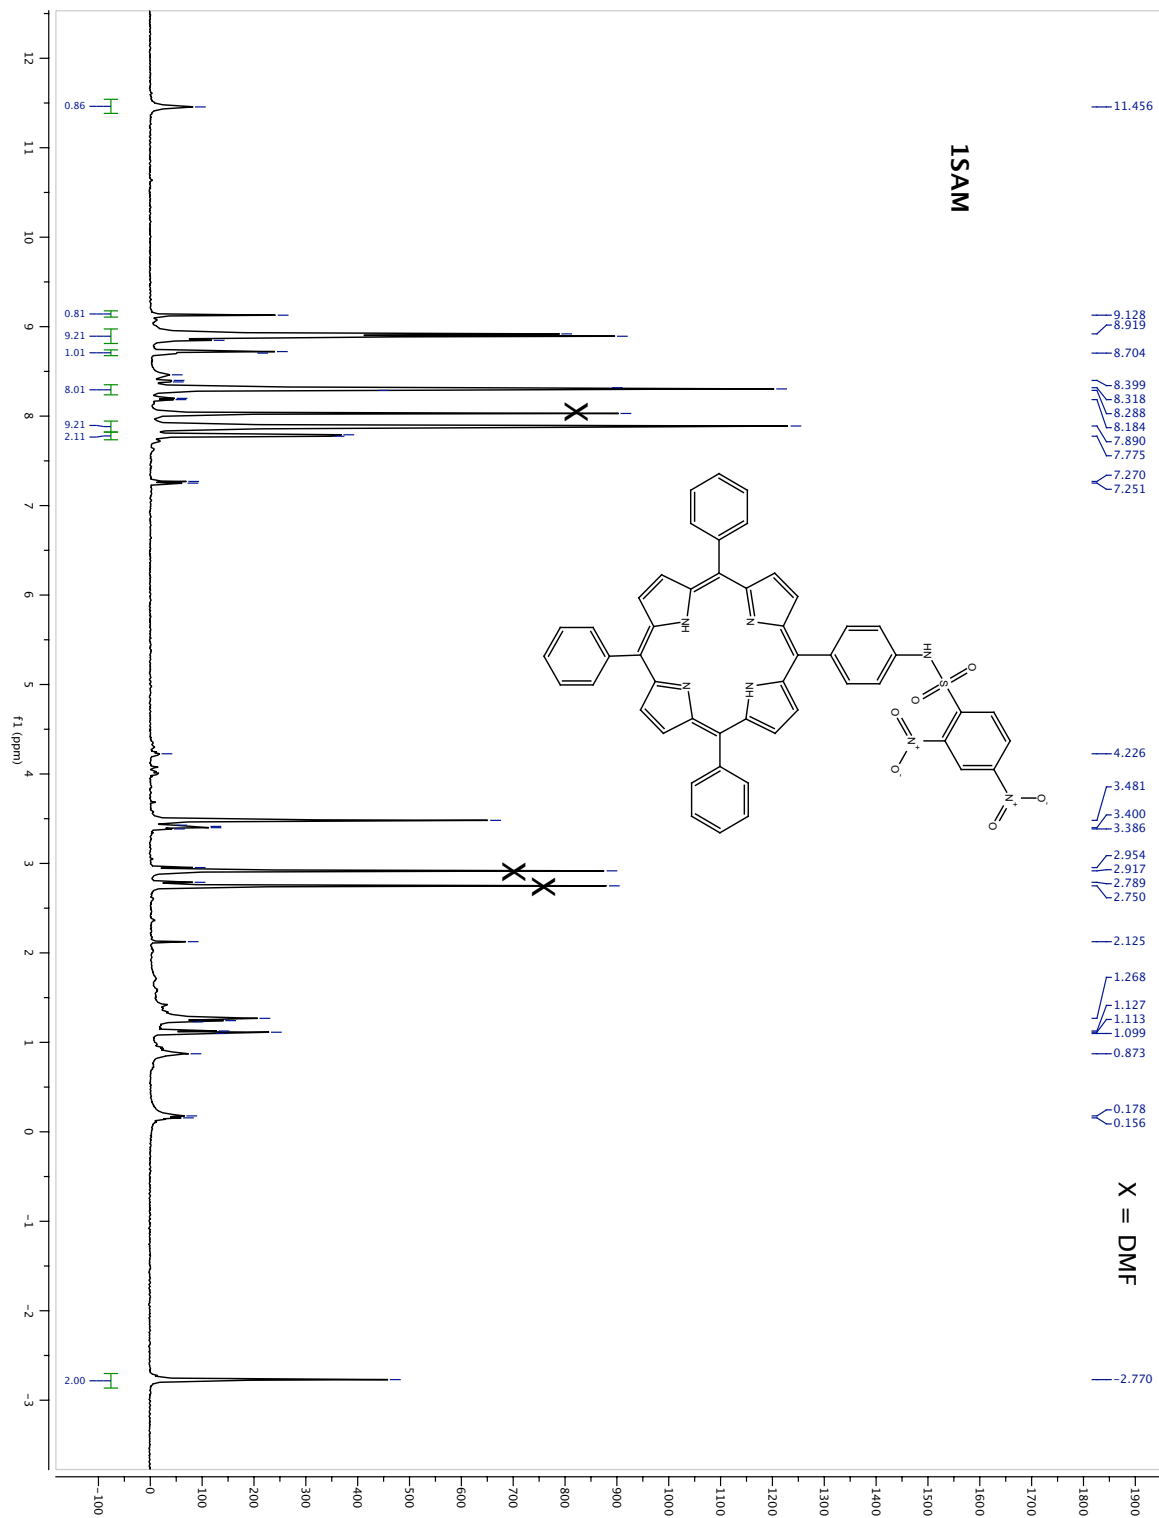

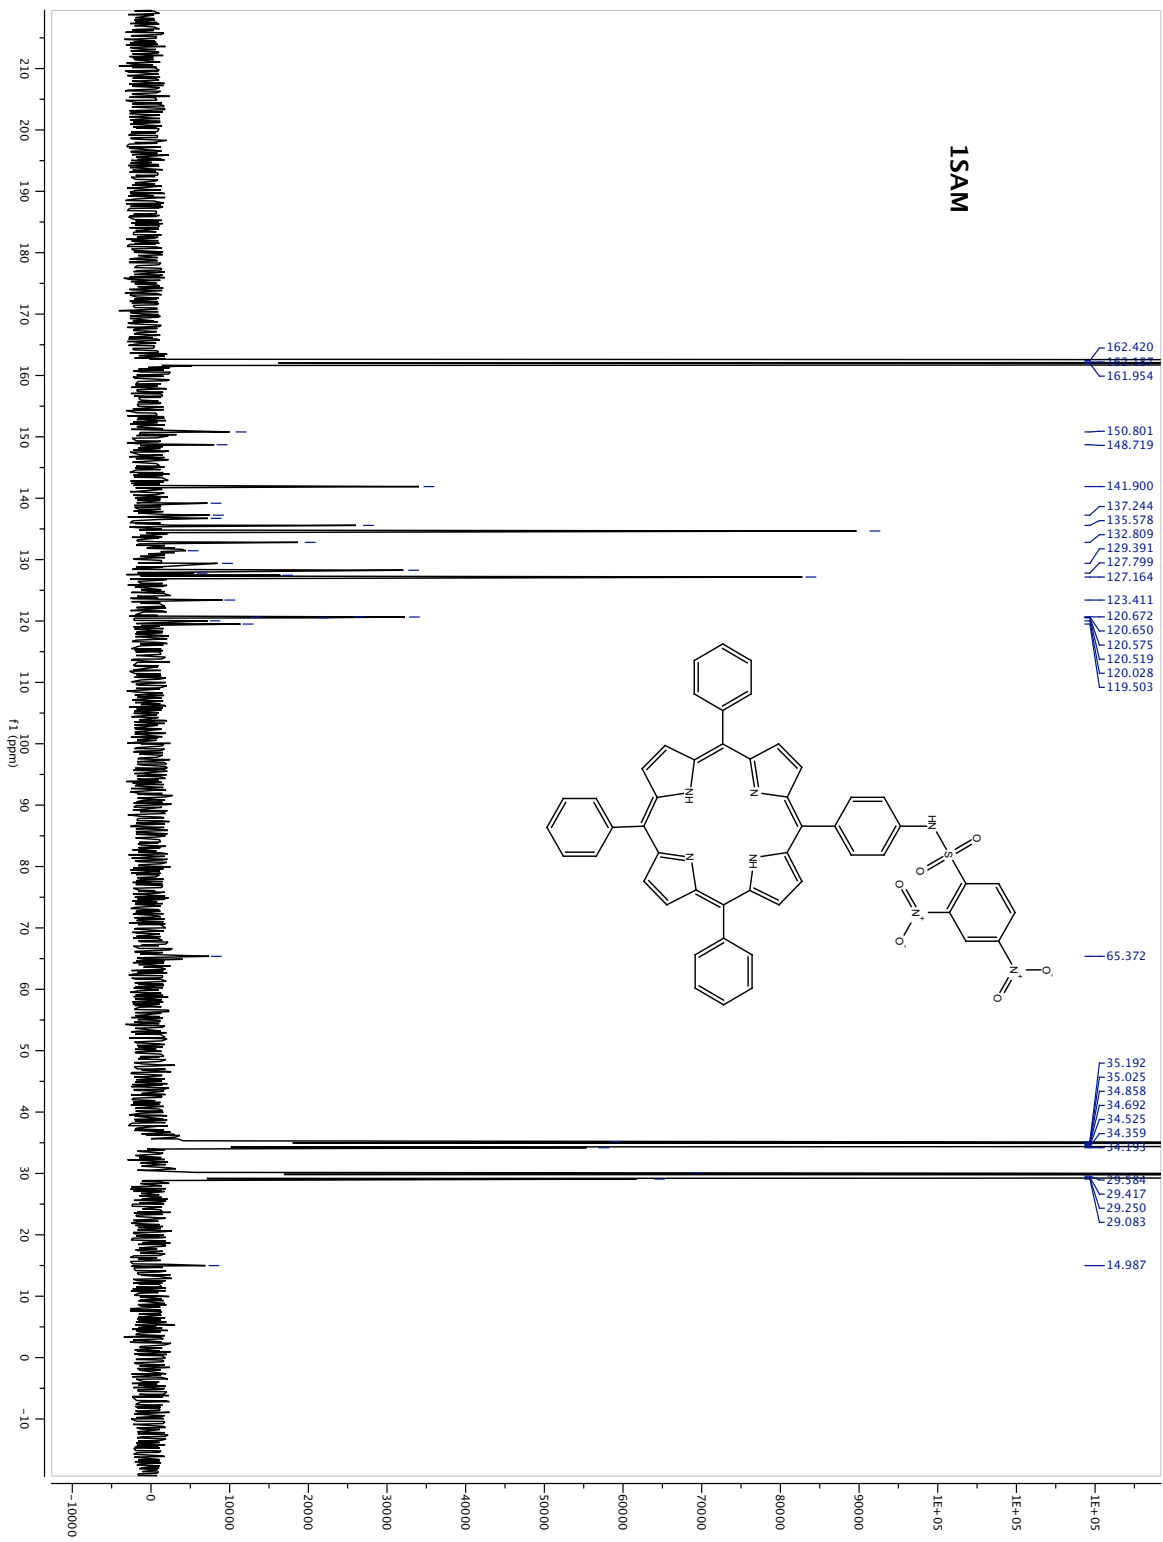

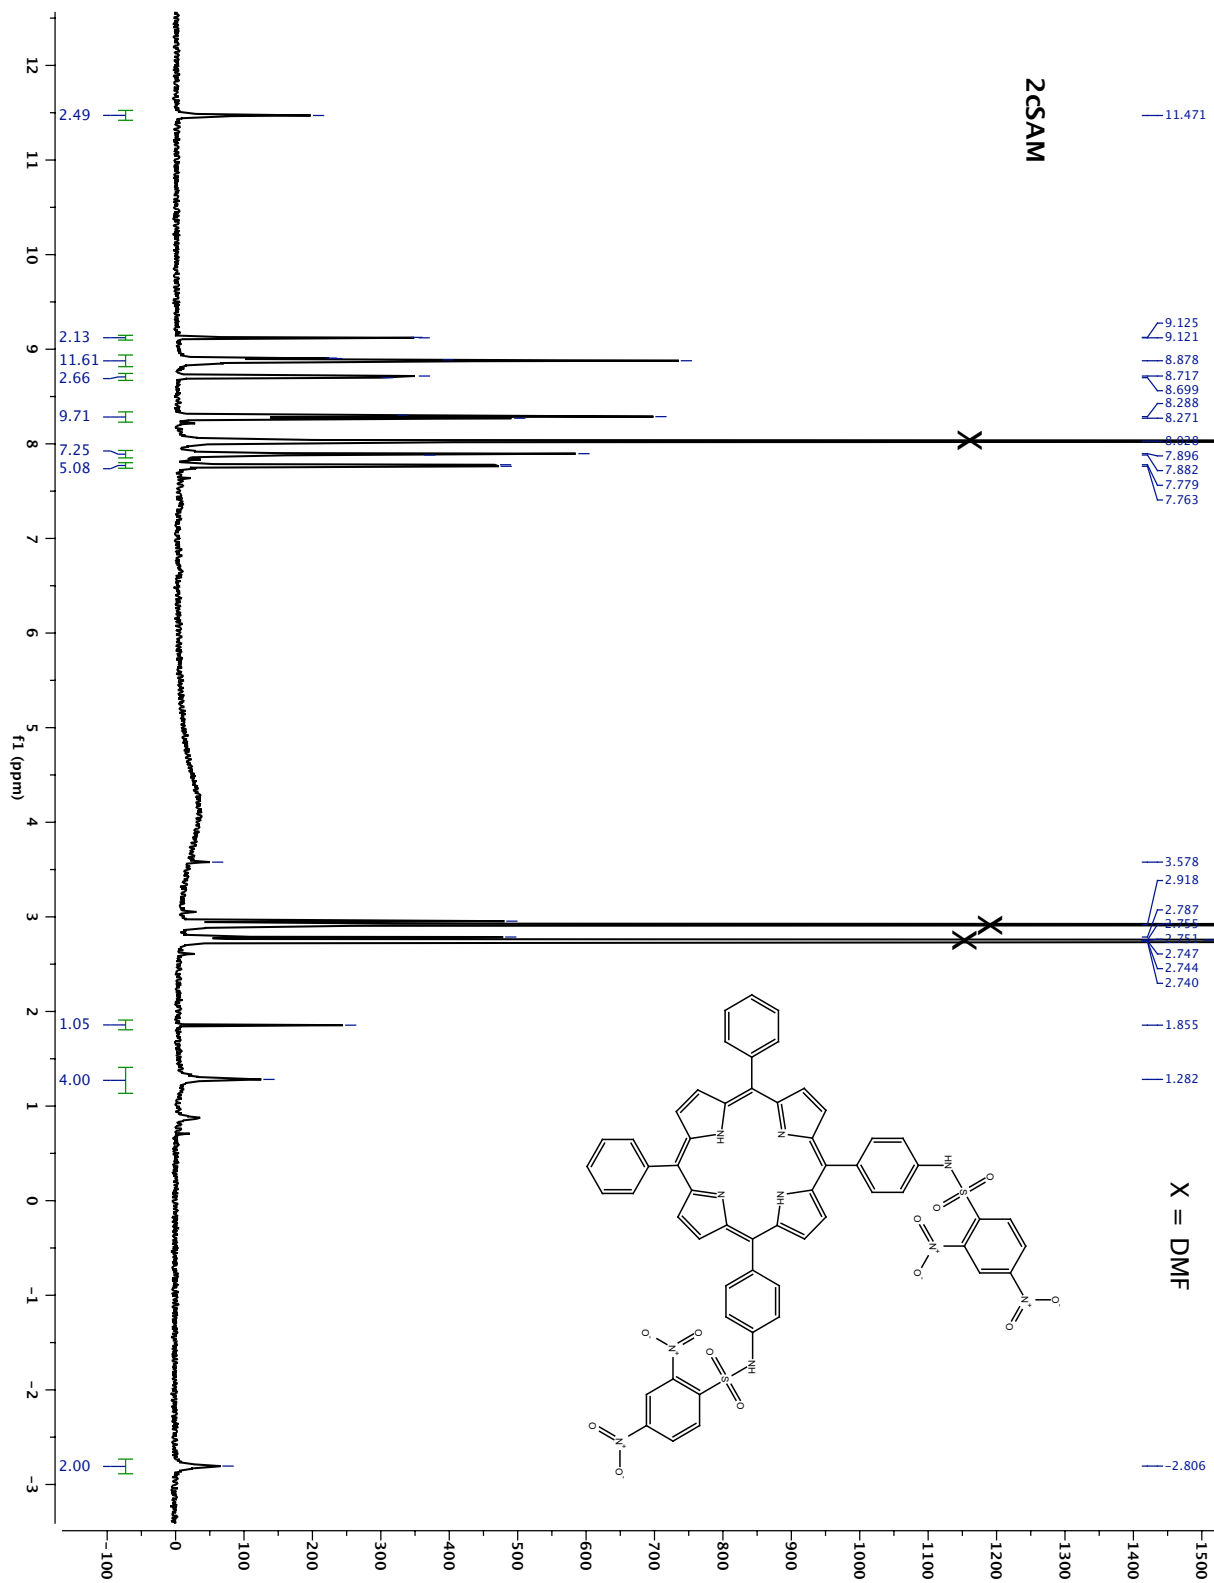



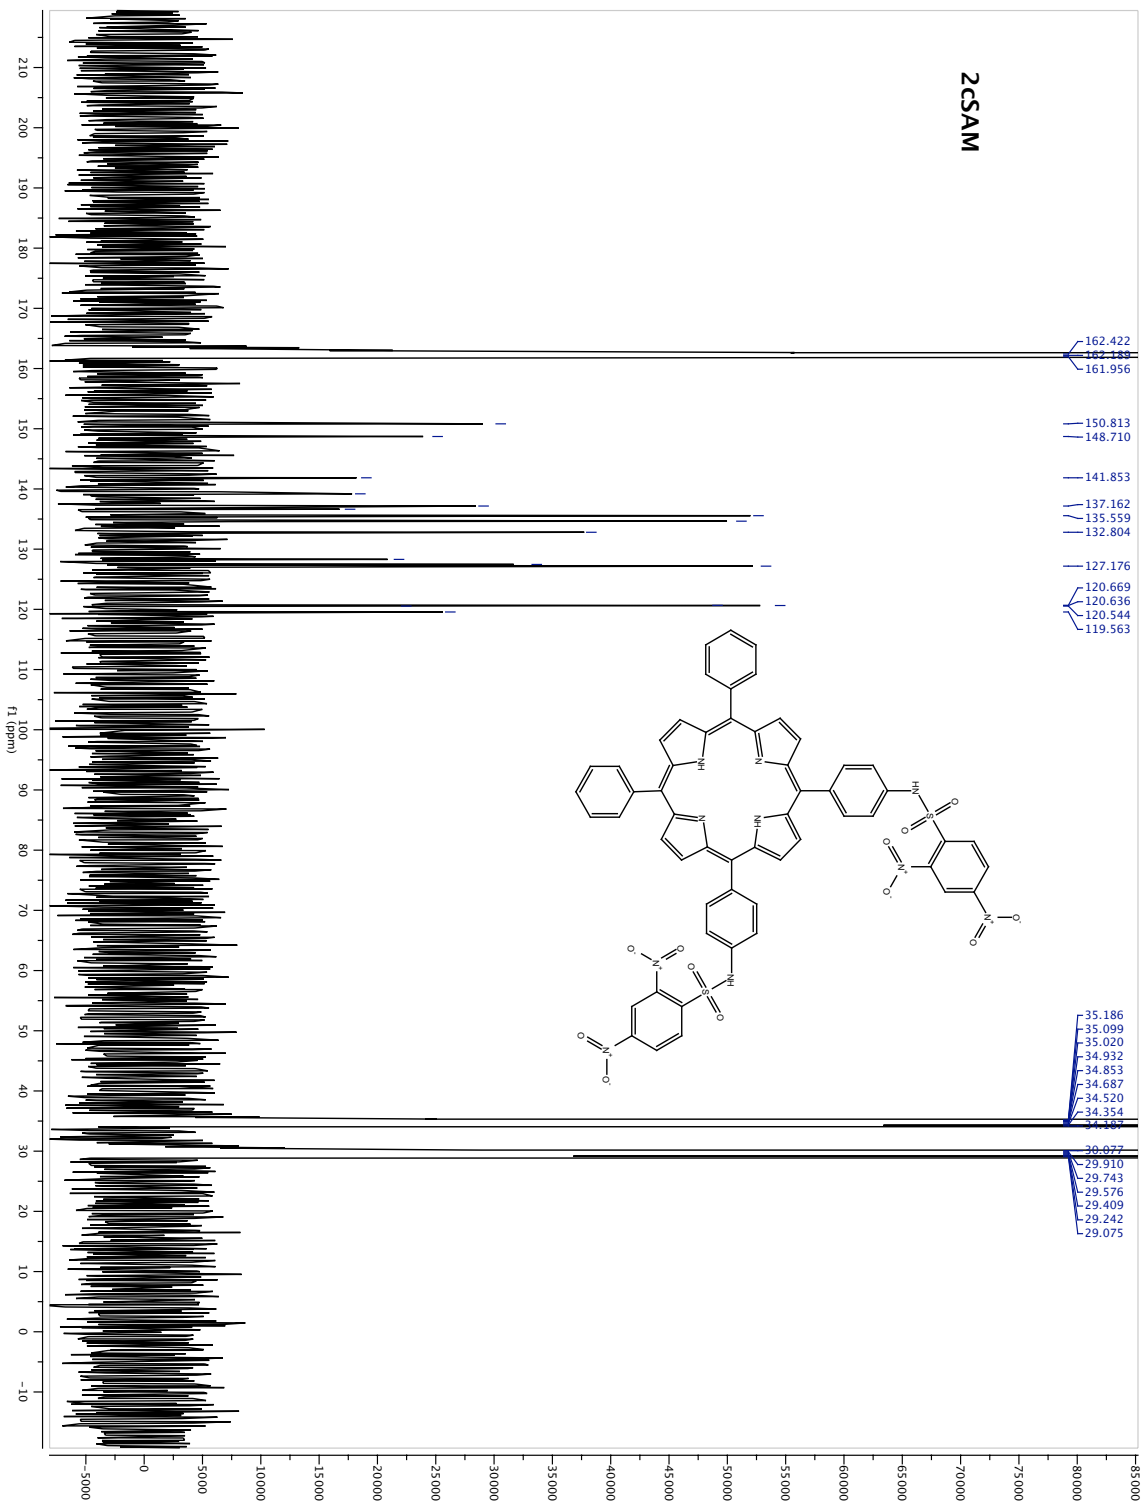

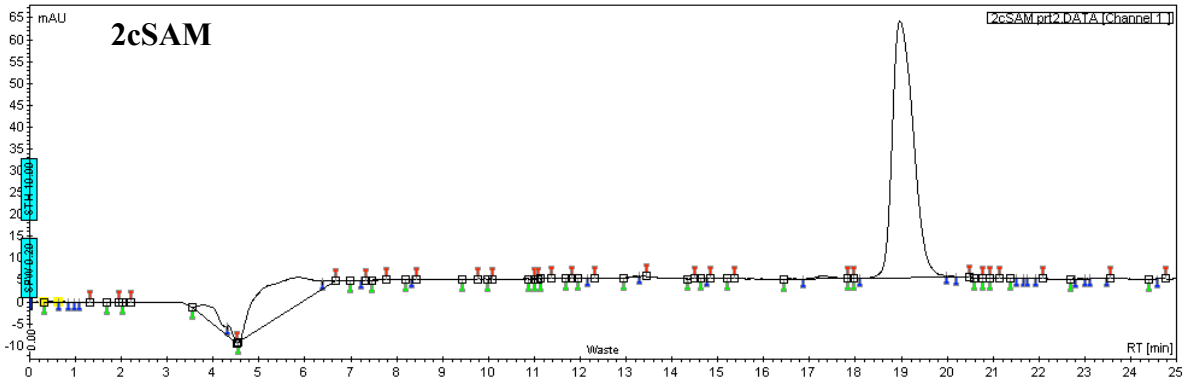

Gradient from 60% to 0% Buffer A

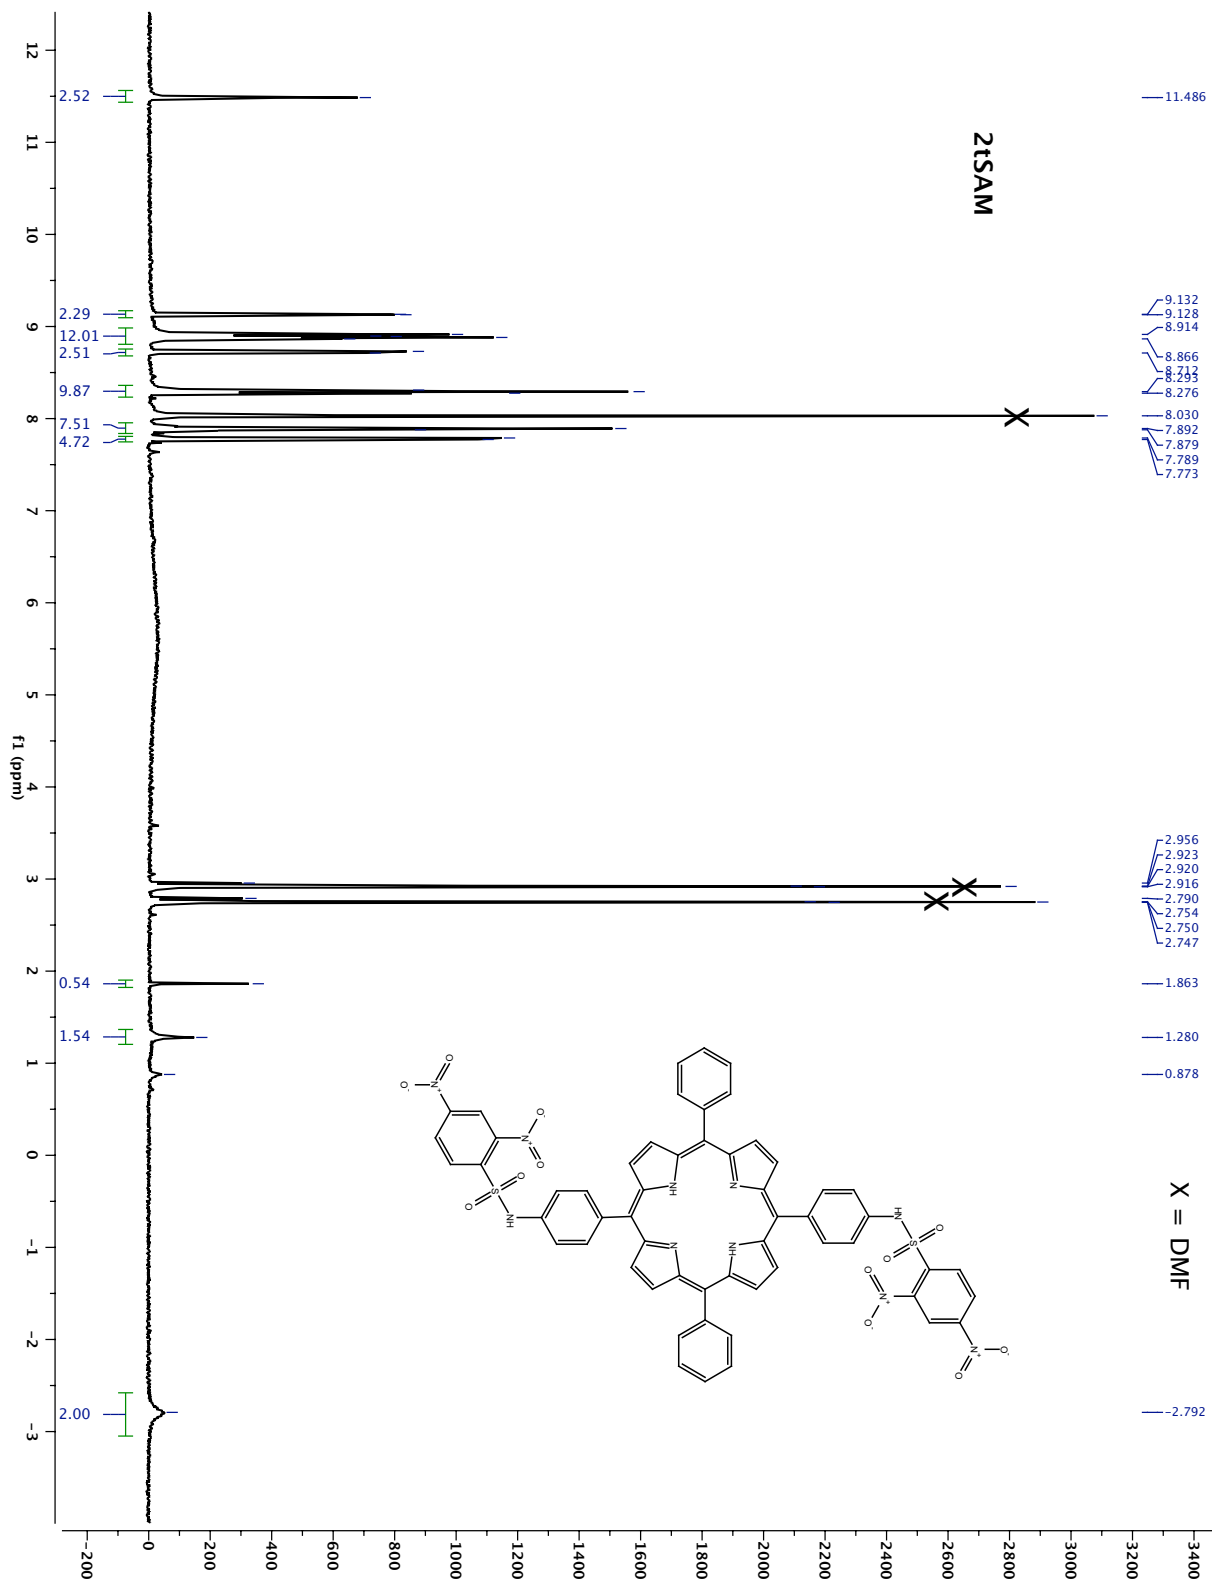

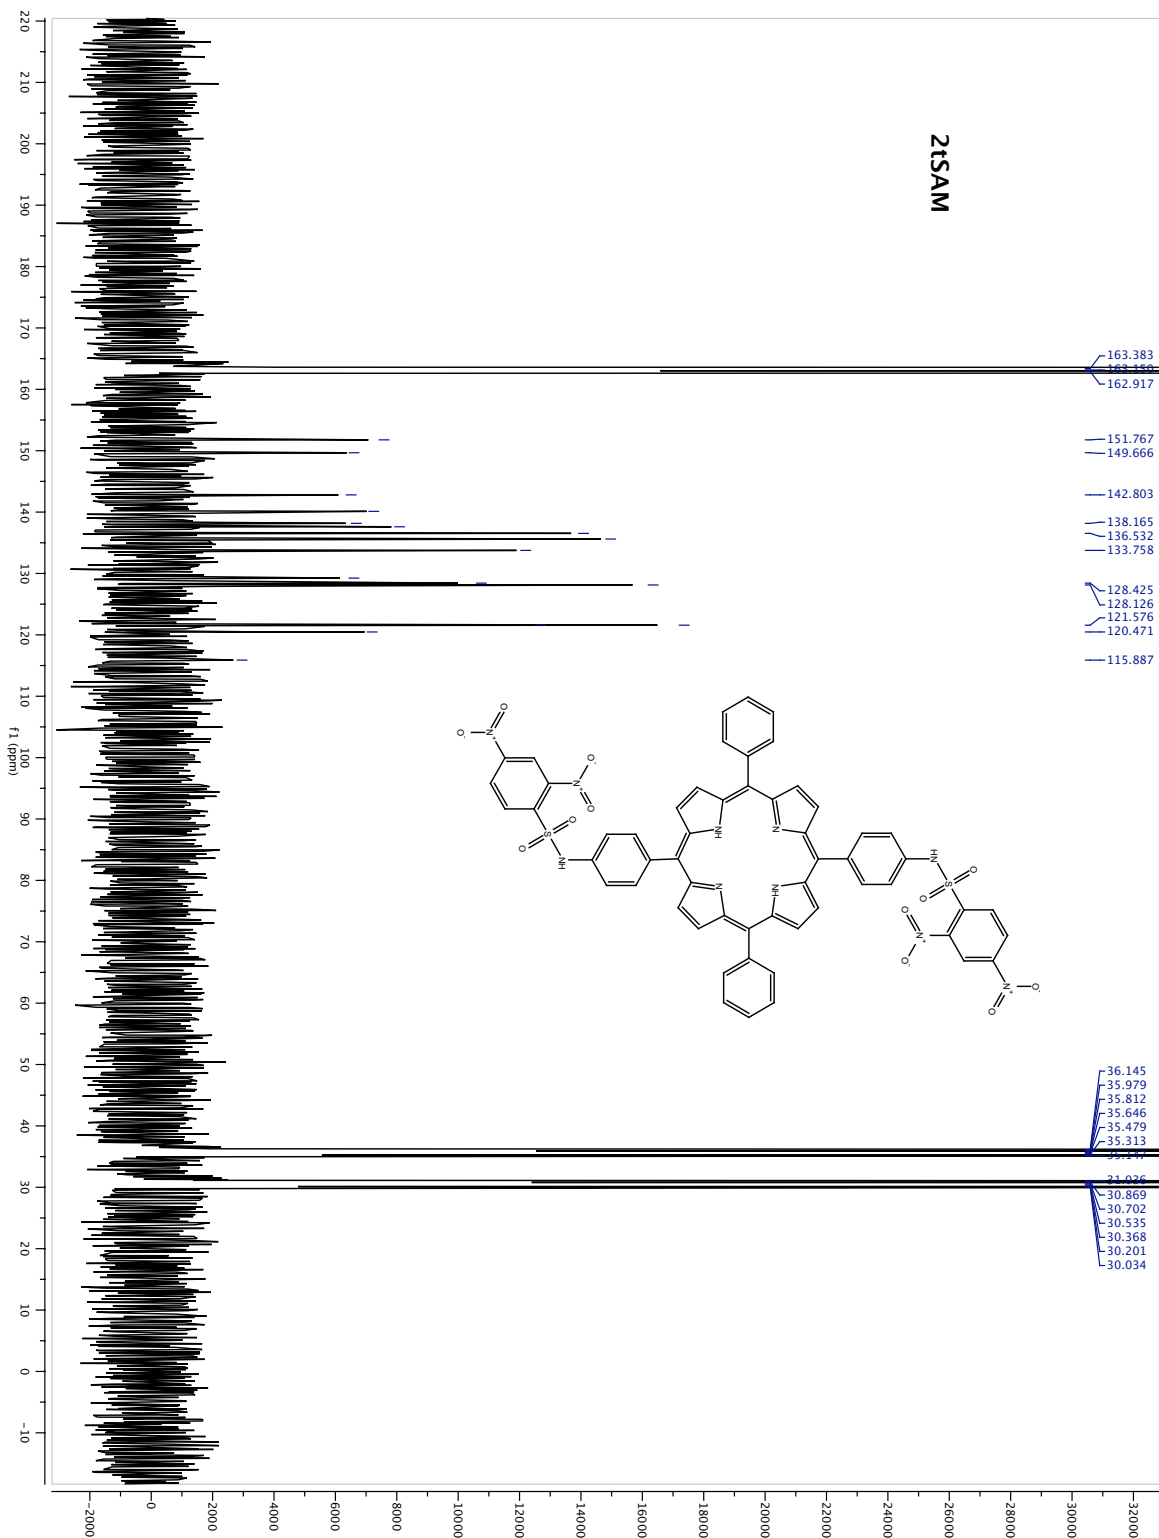

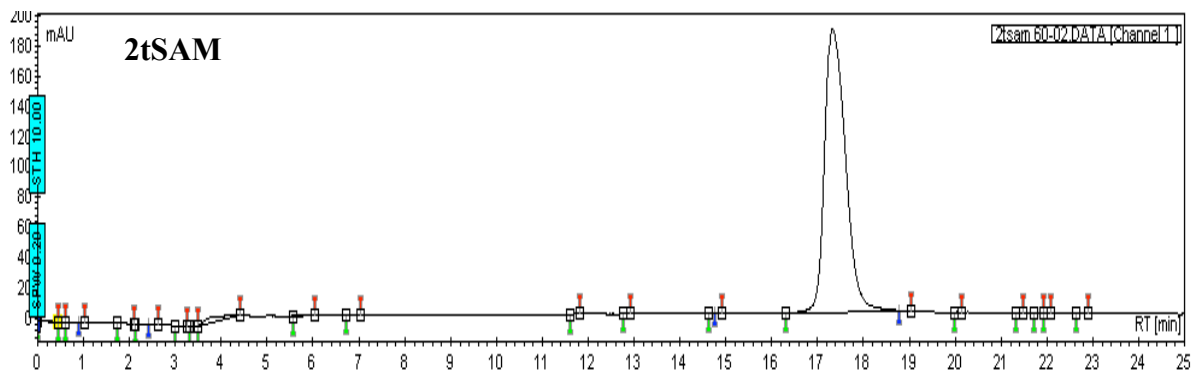

Gradient from 60% to 0% Buffer A

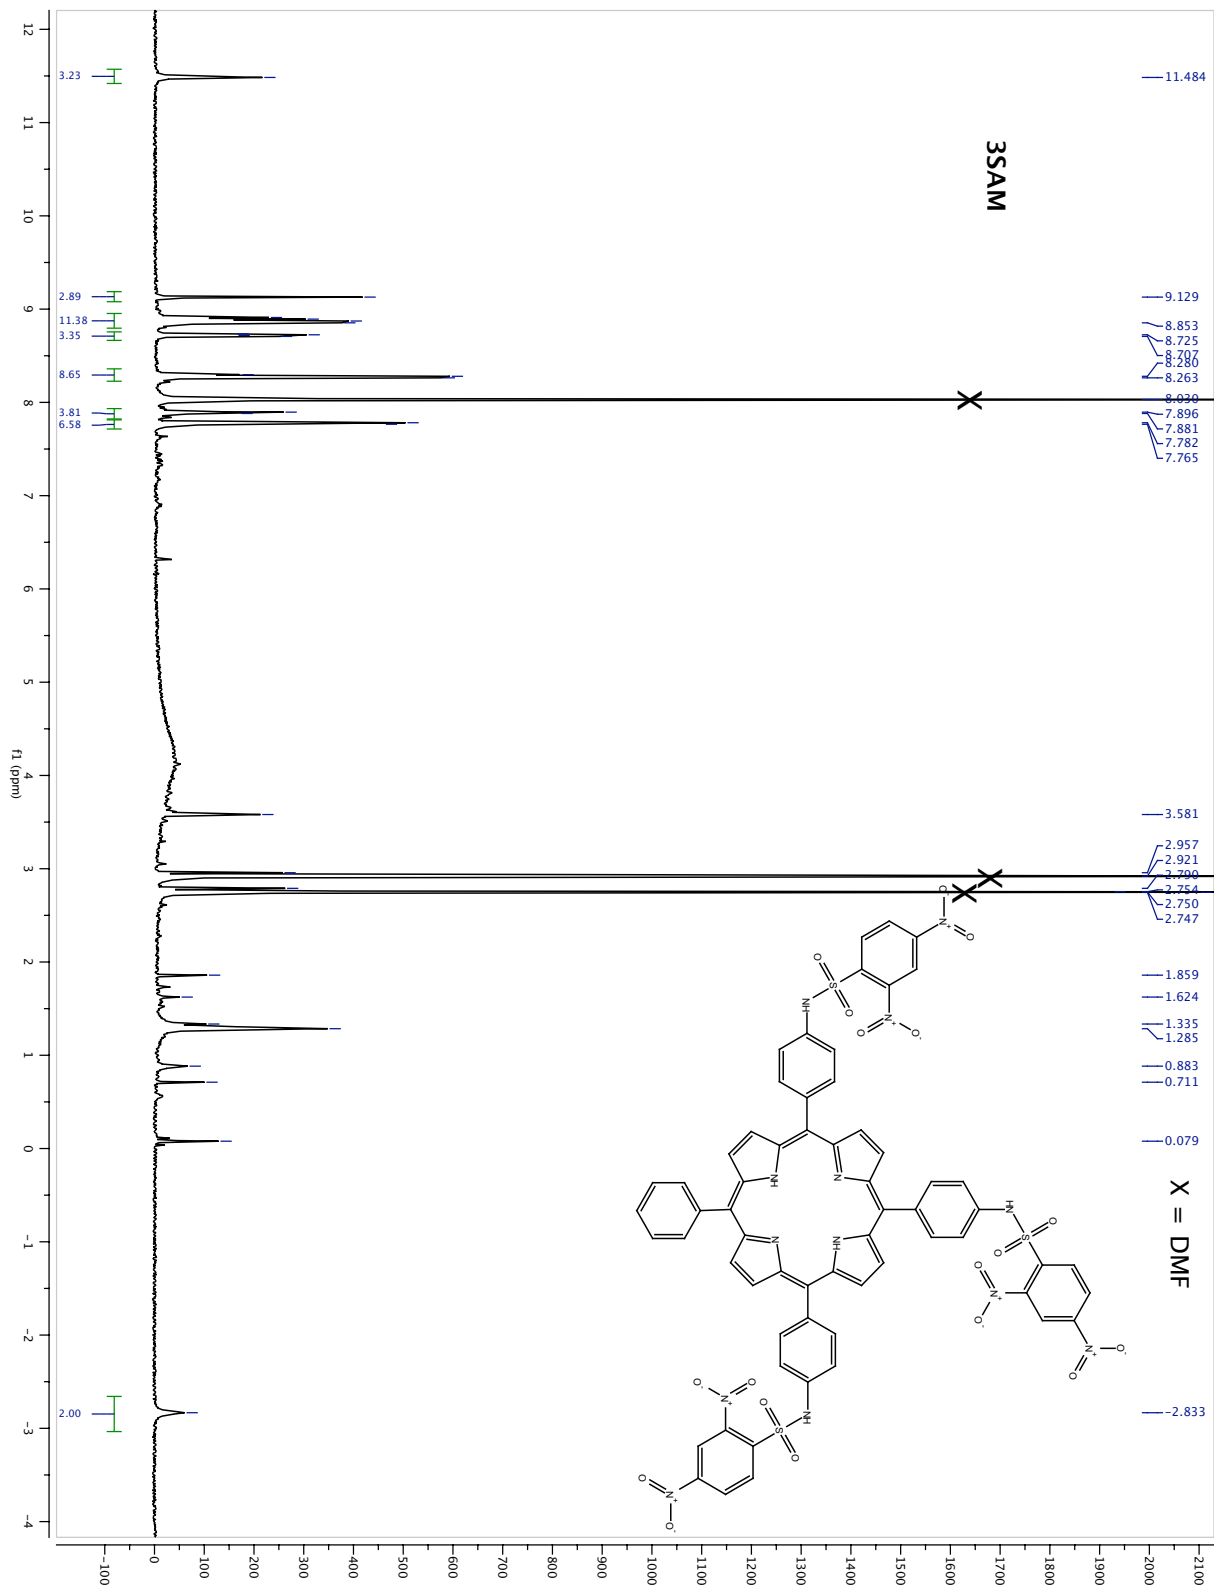

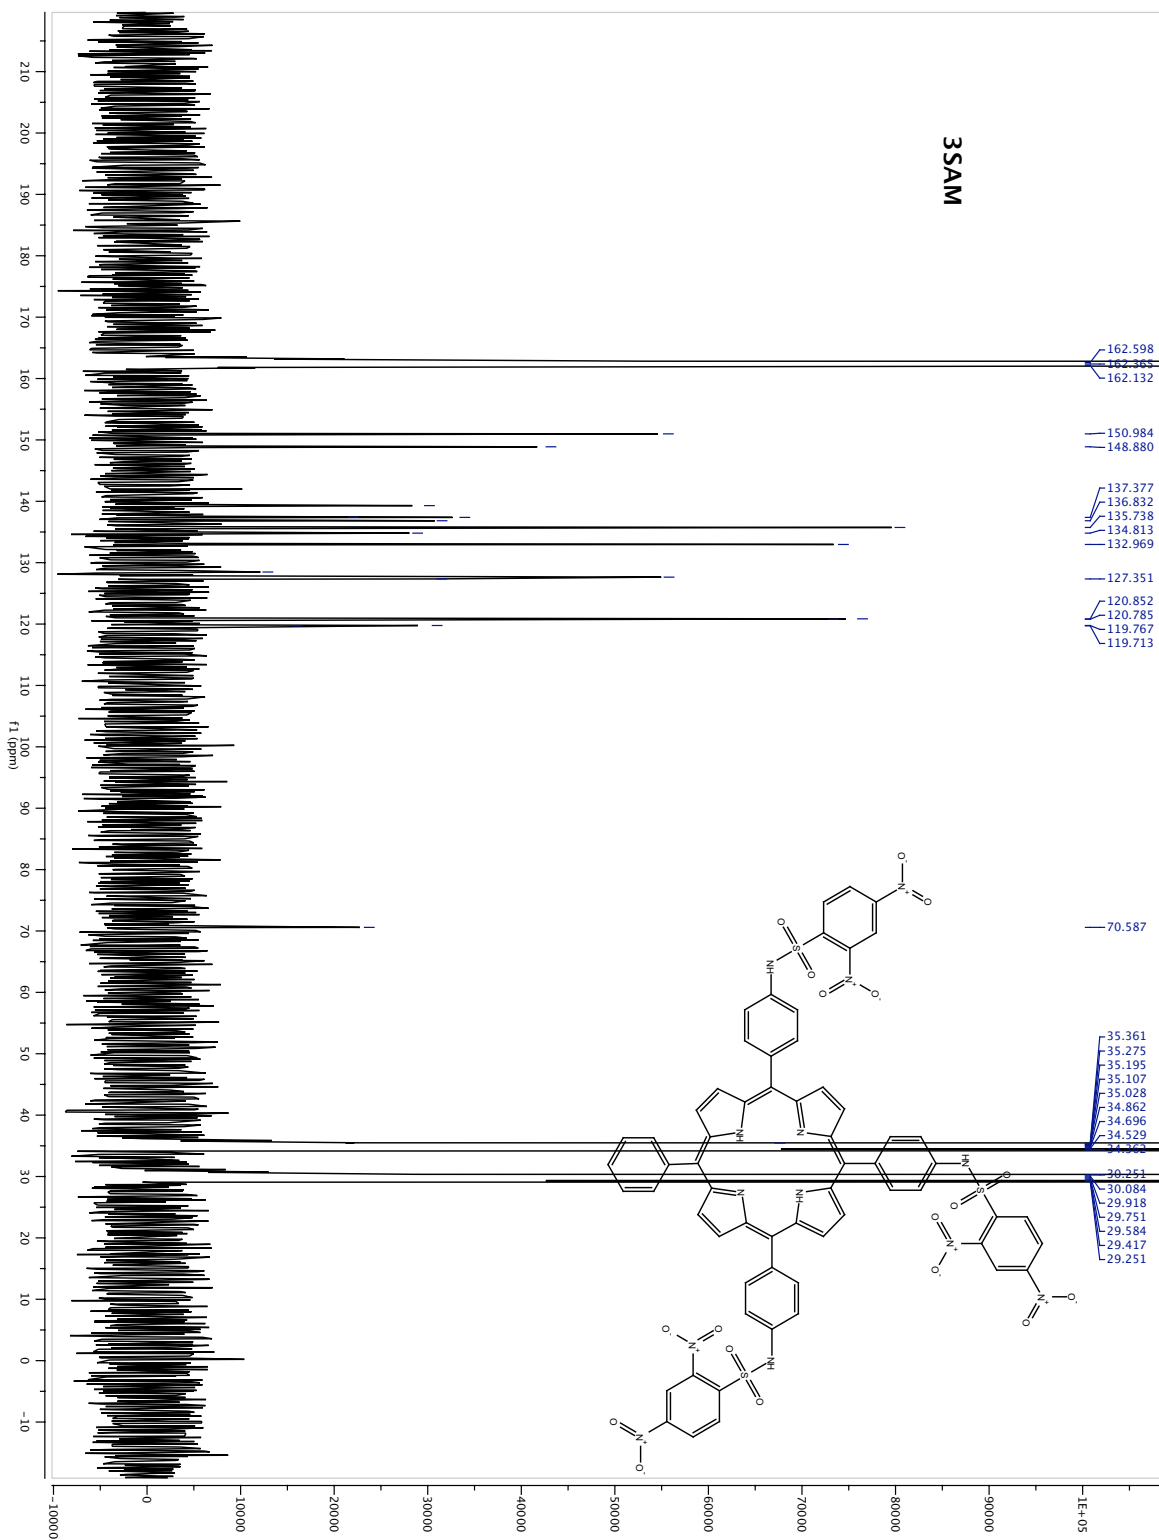

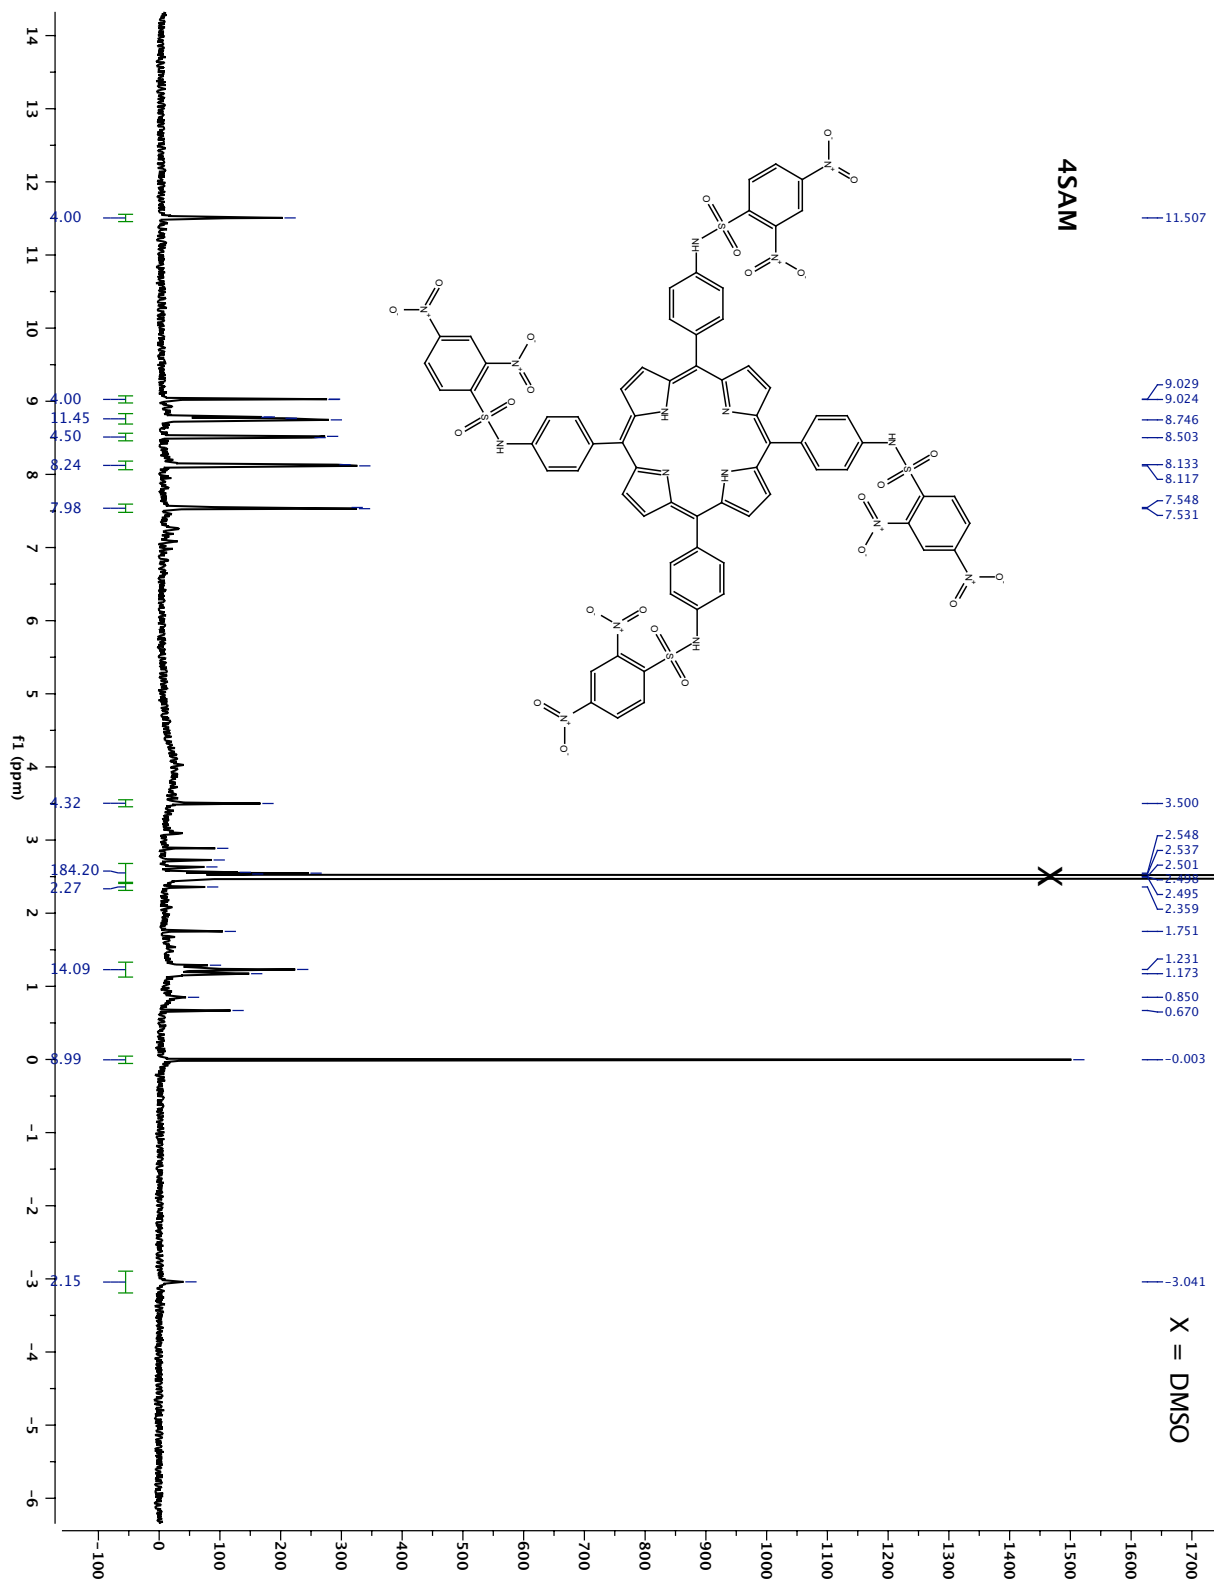



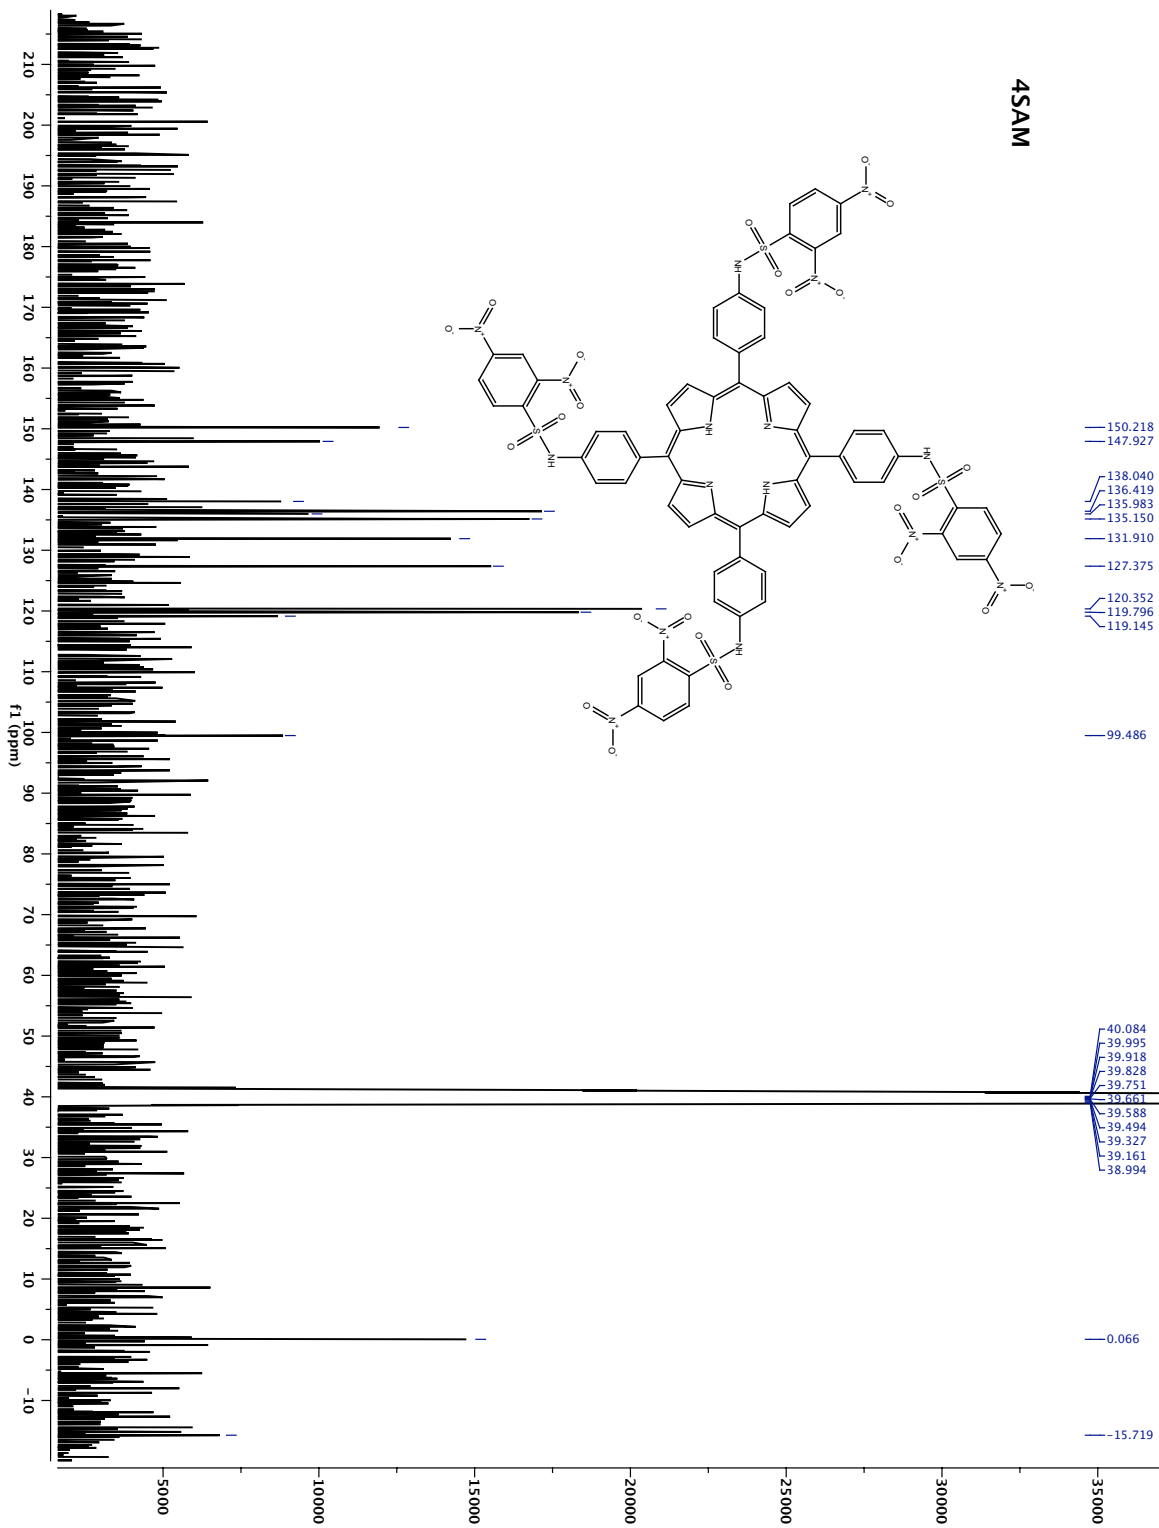

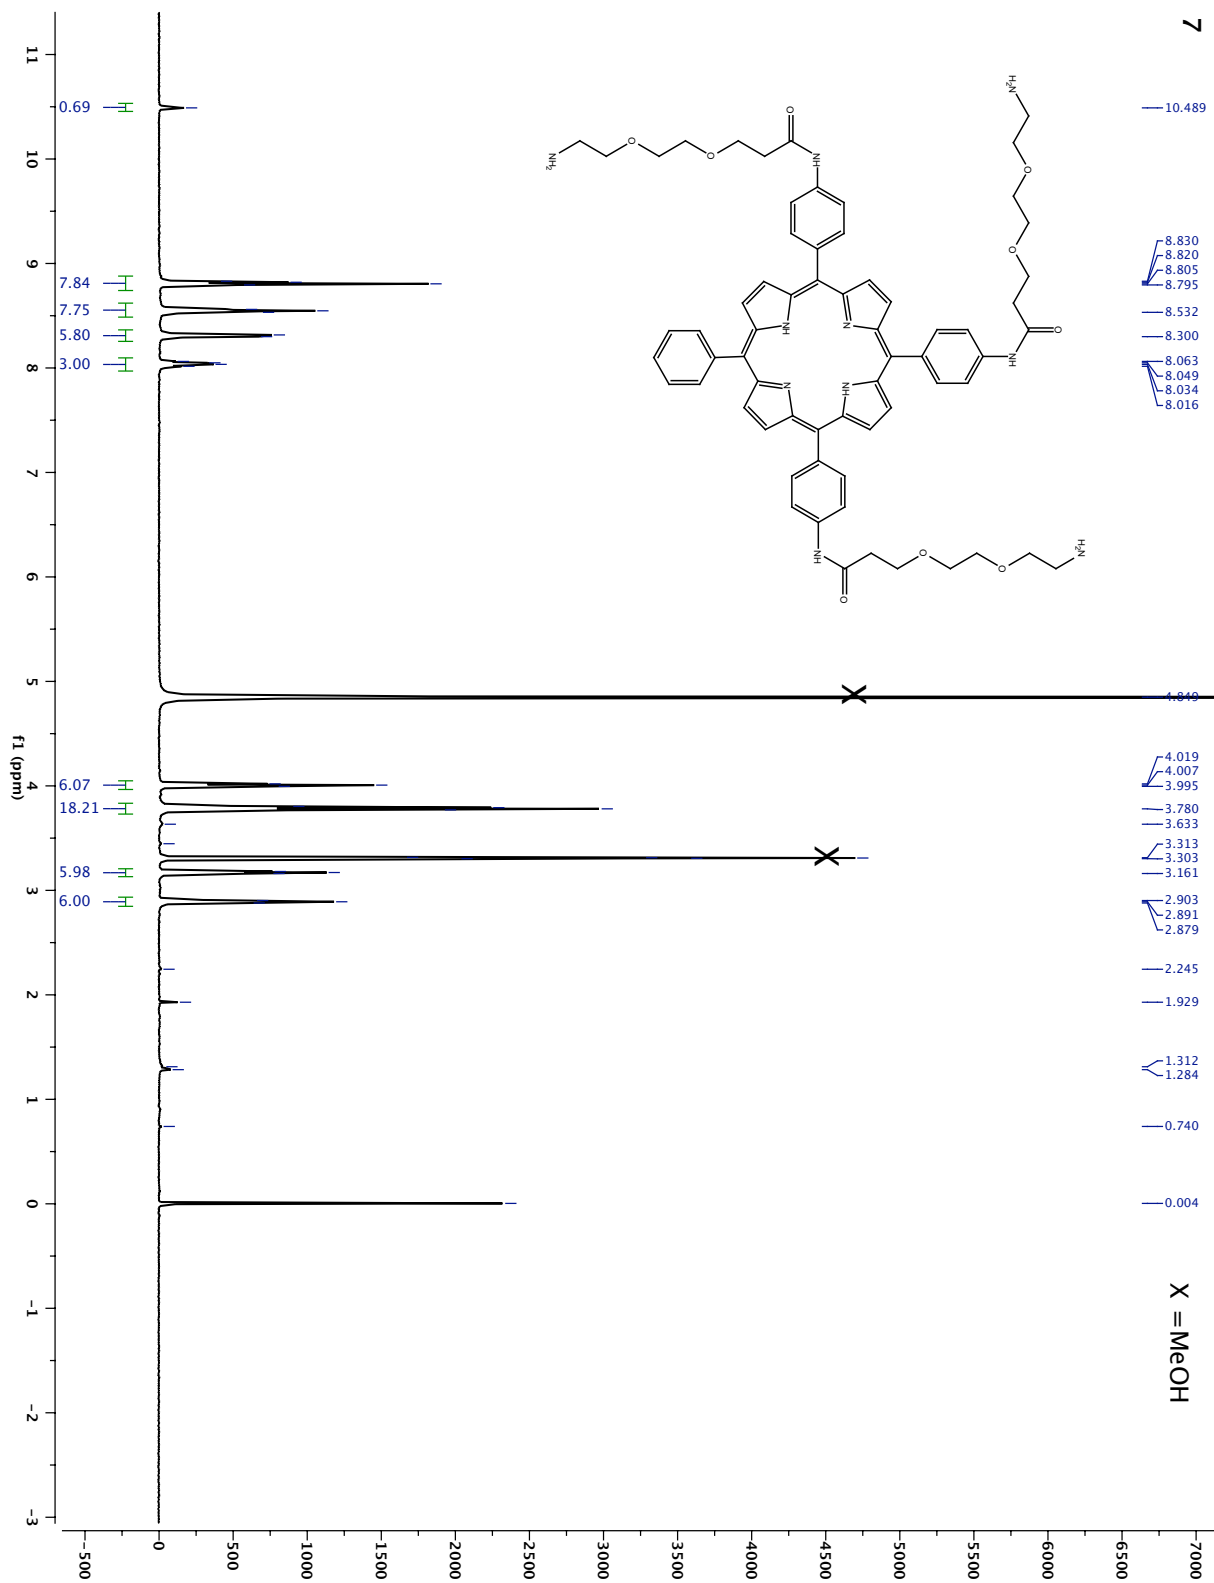

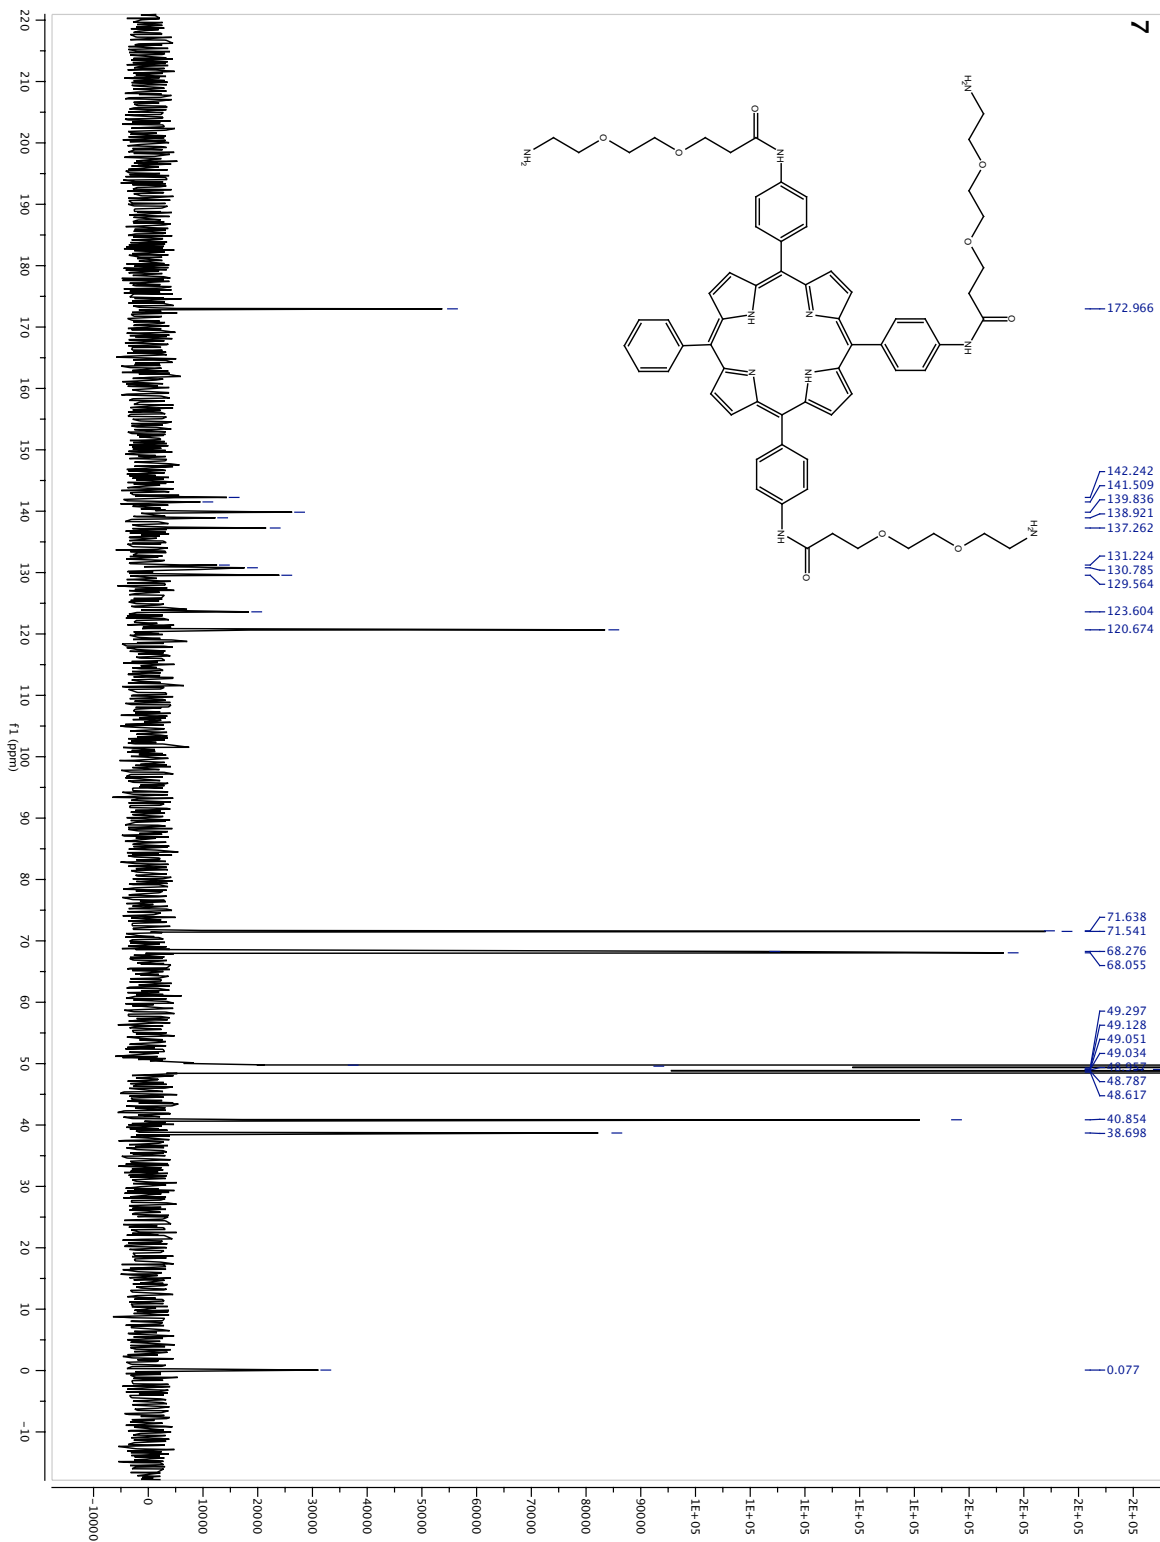

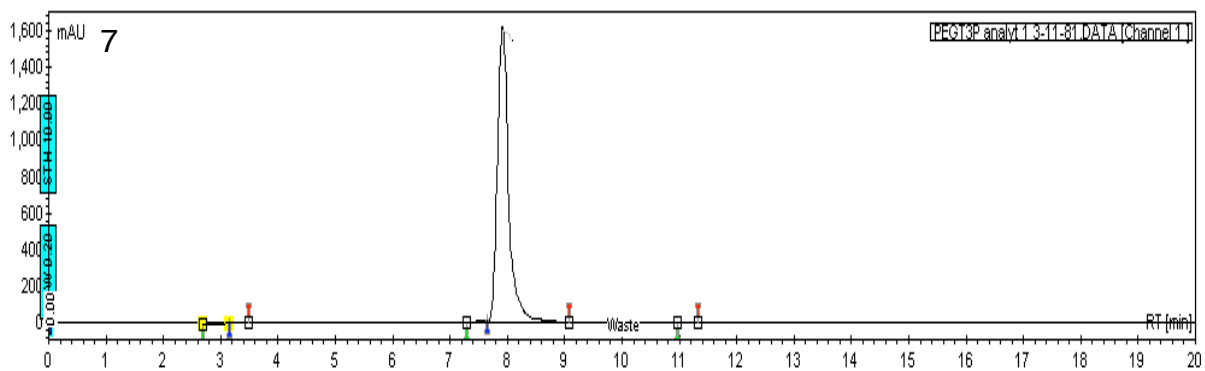

Gradient from 80% to 20% Buffer A

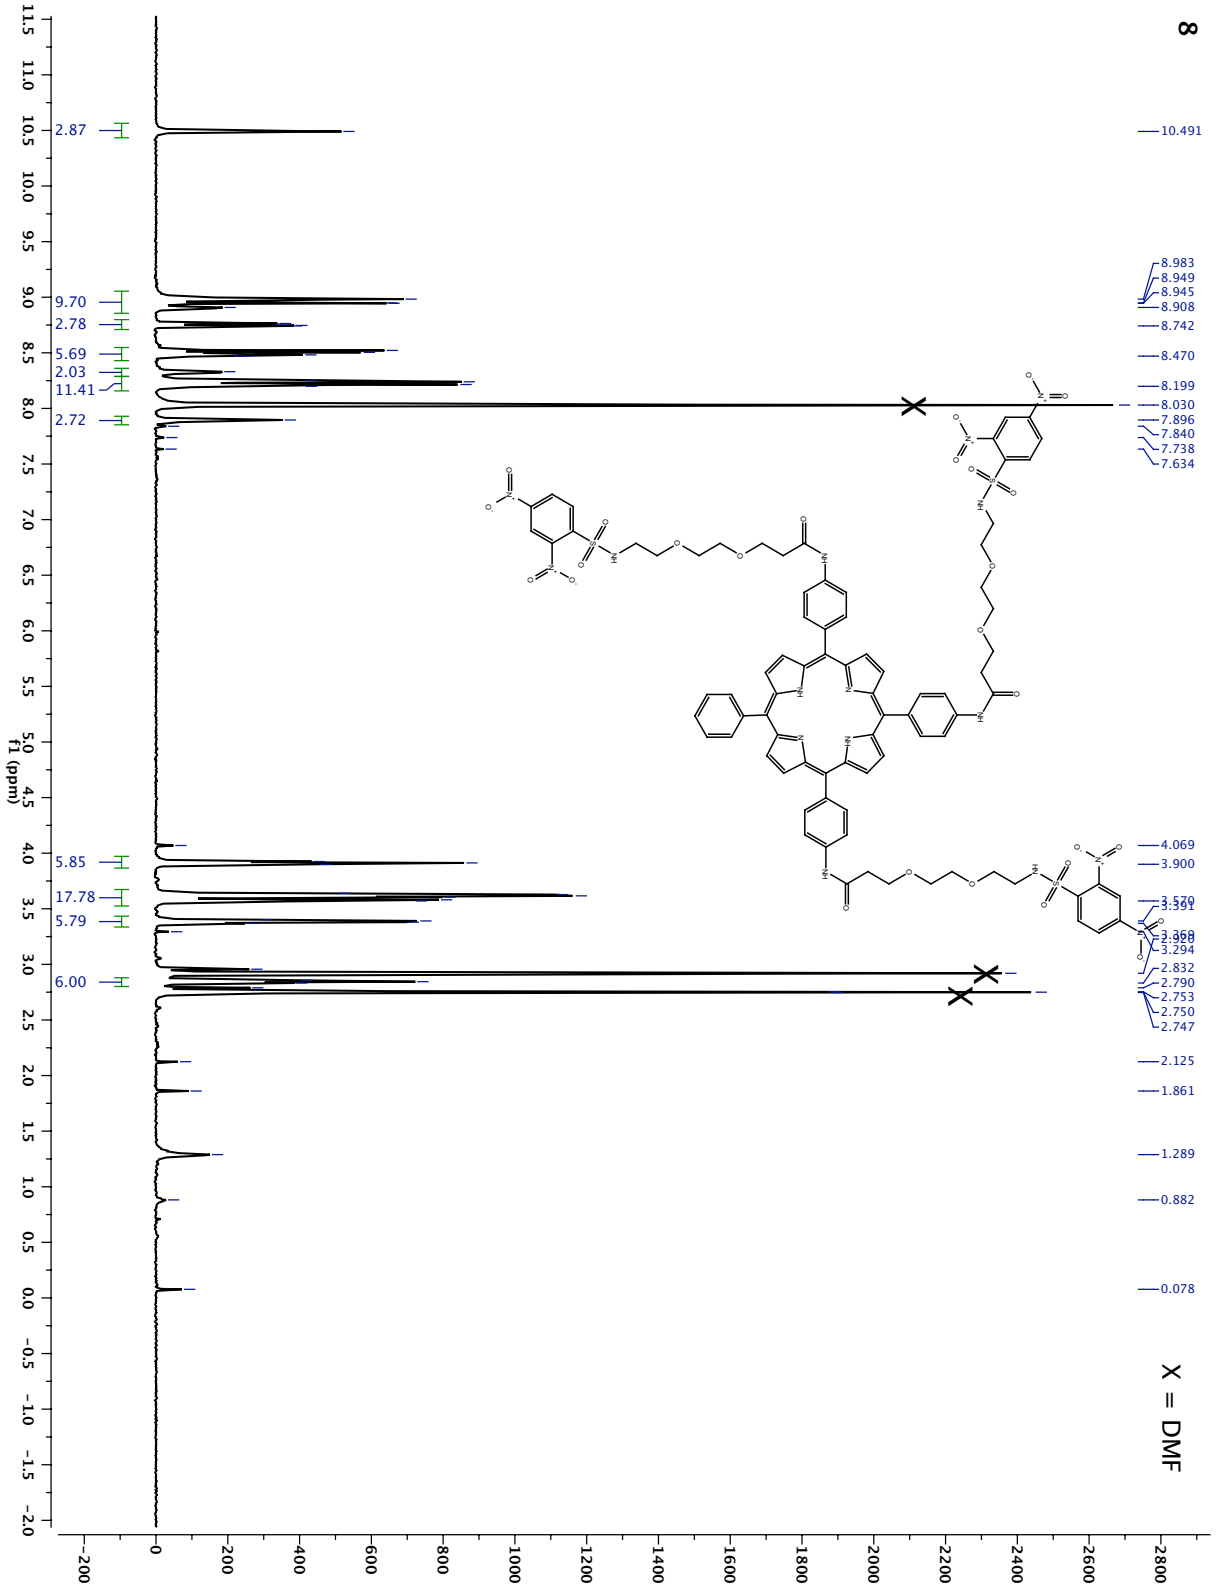

X = DMF

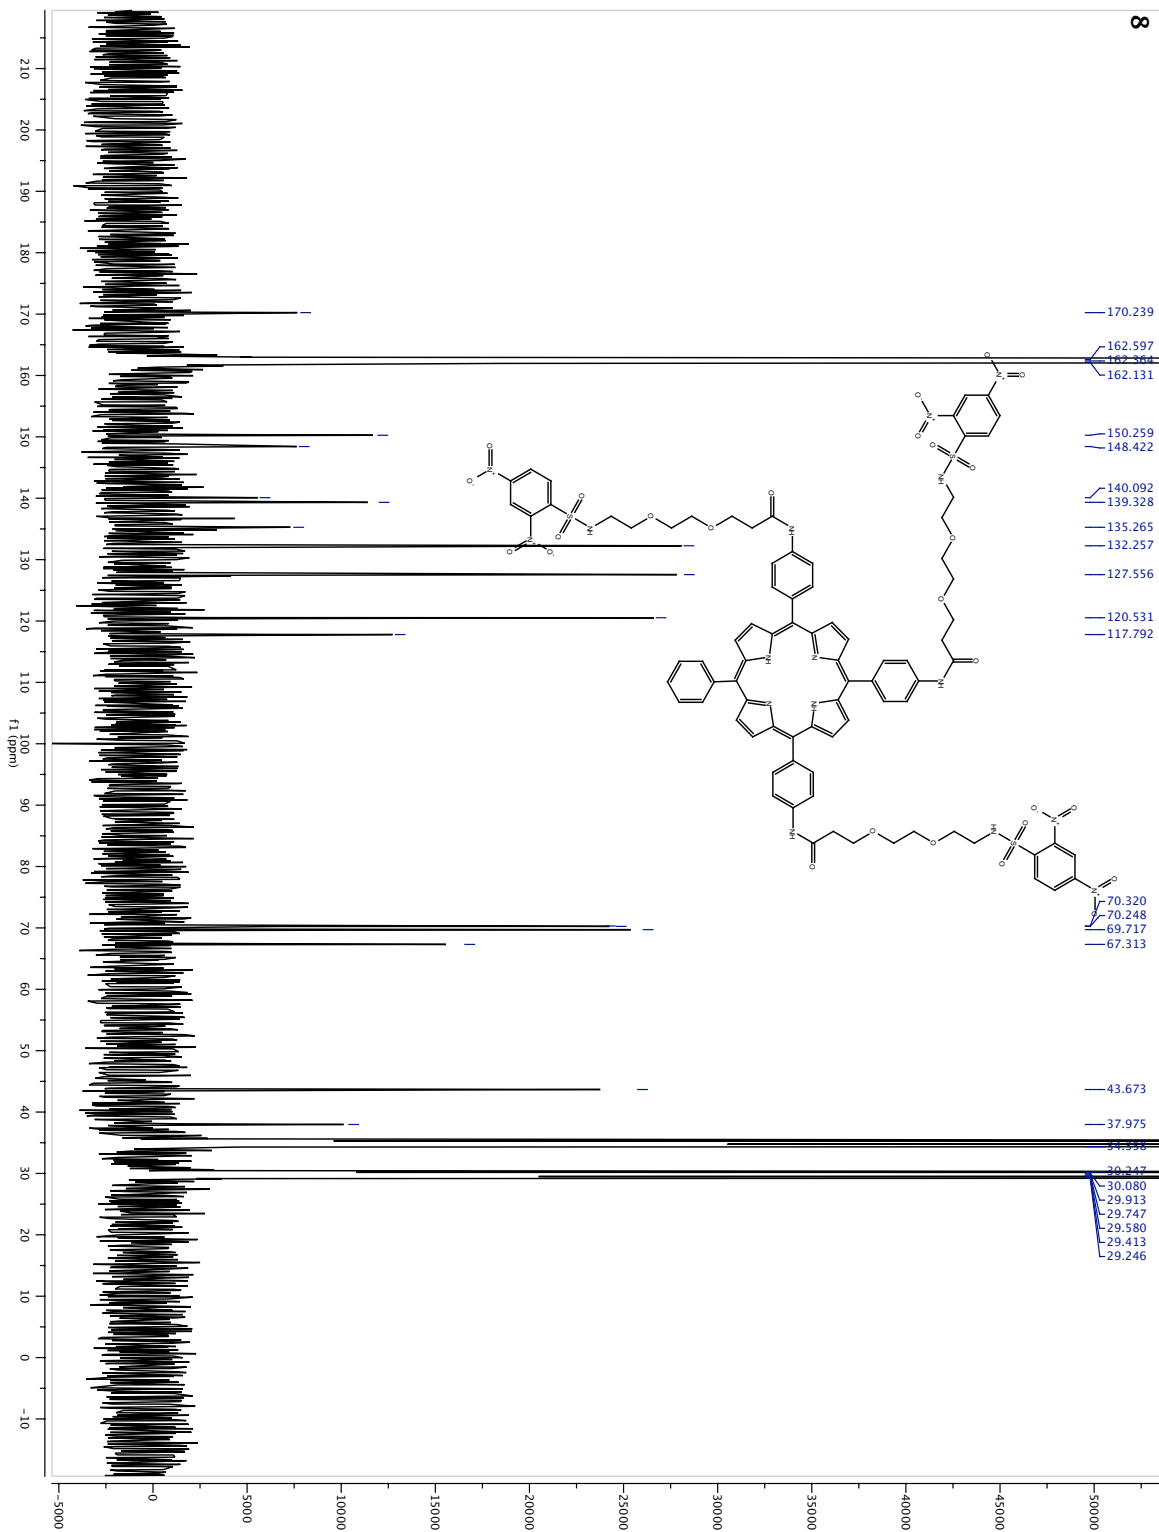

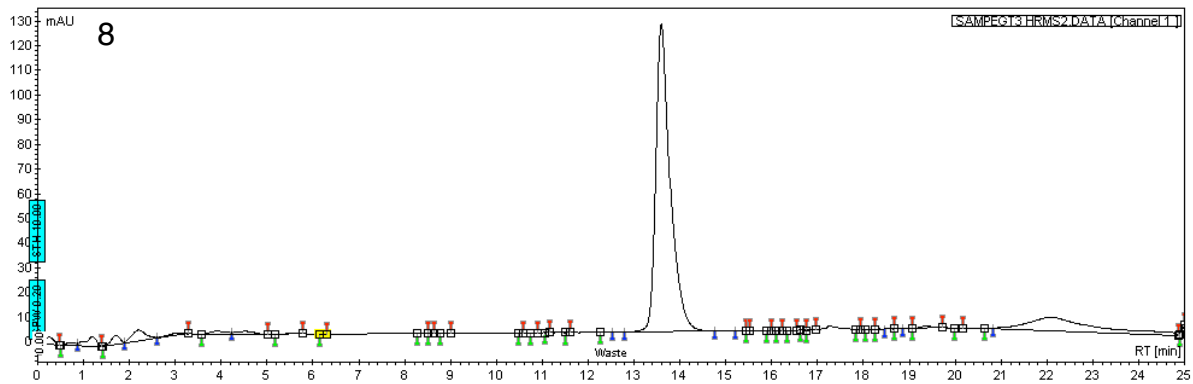

Gradient from 60% to 0% Buffer A

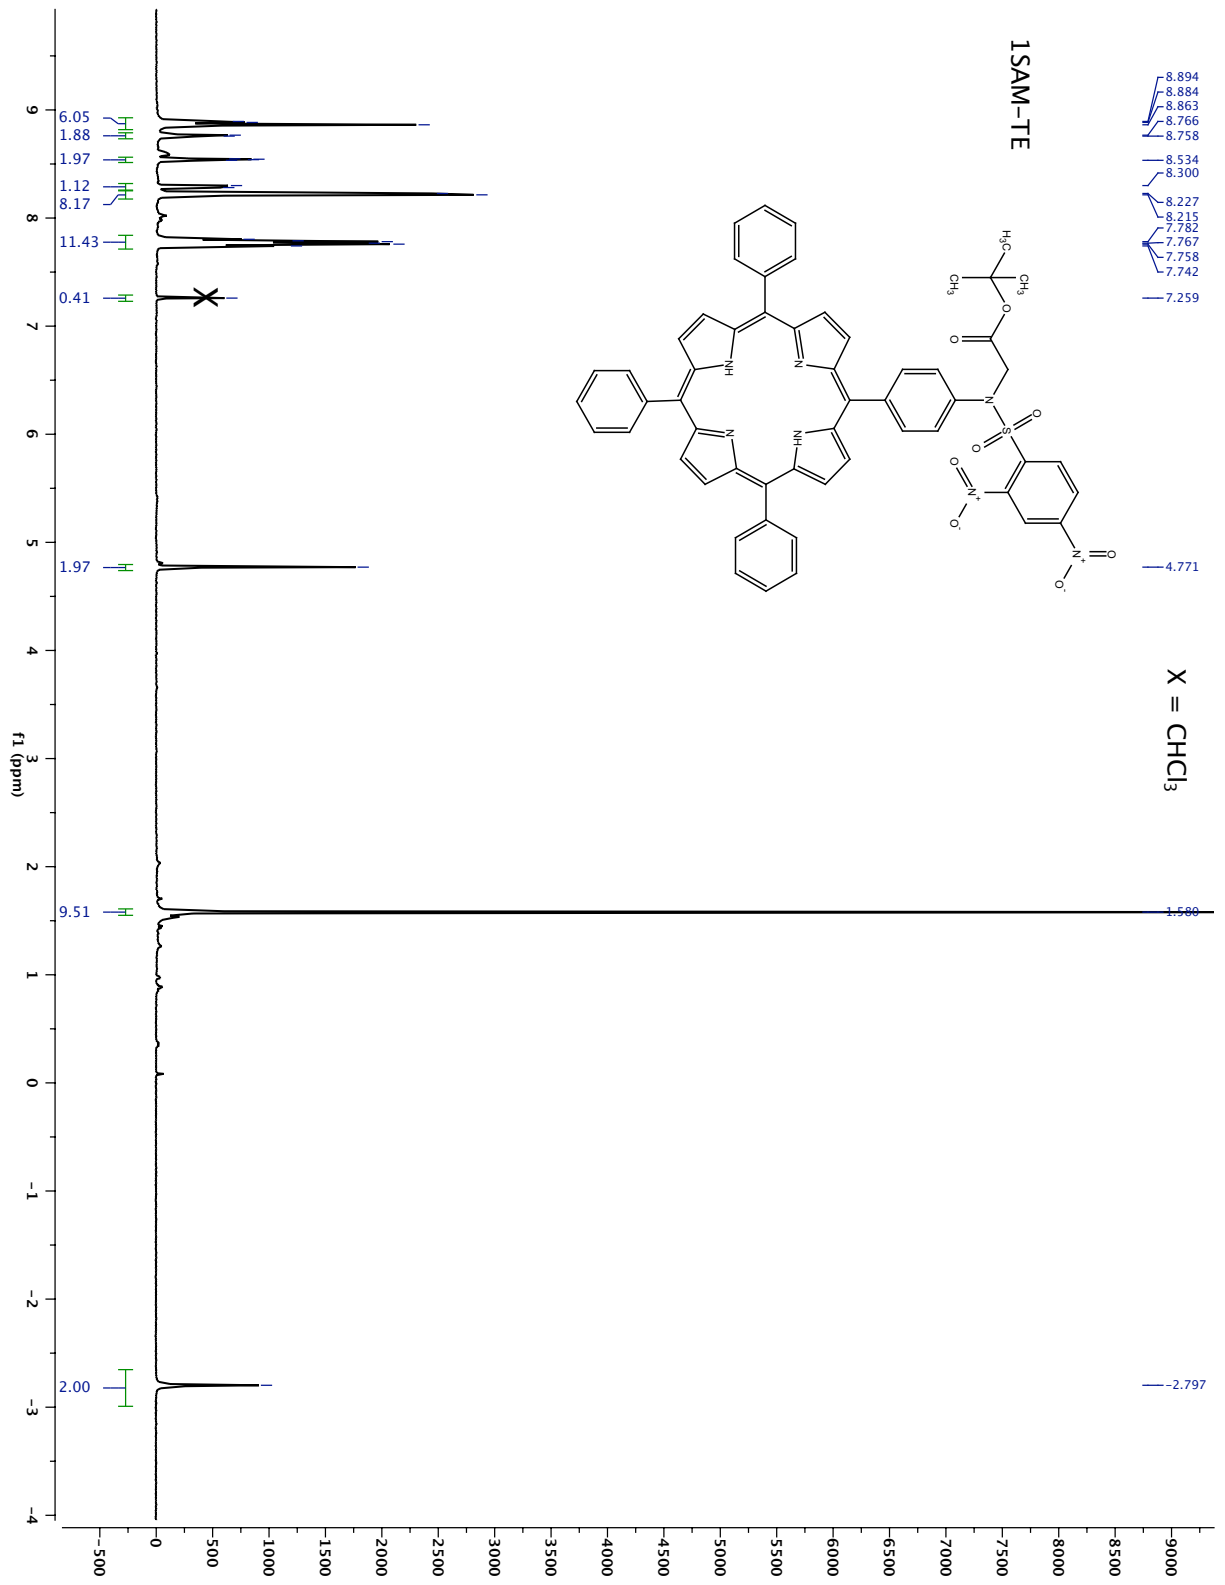



1SAM-TE

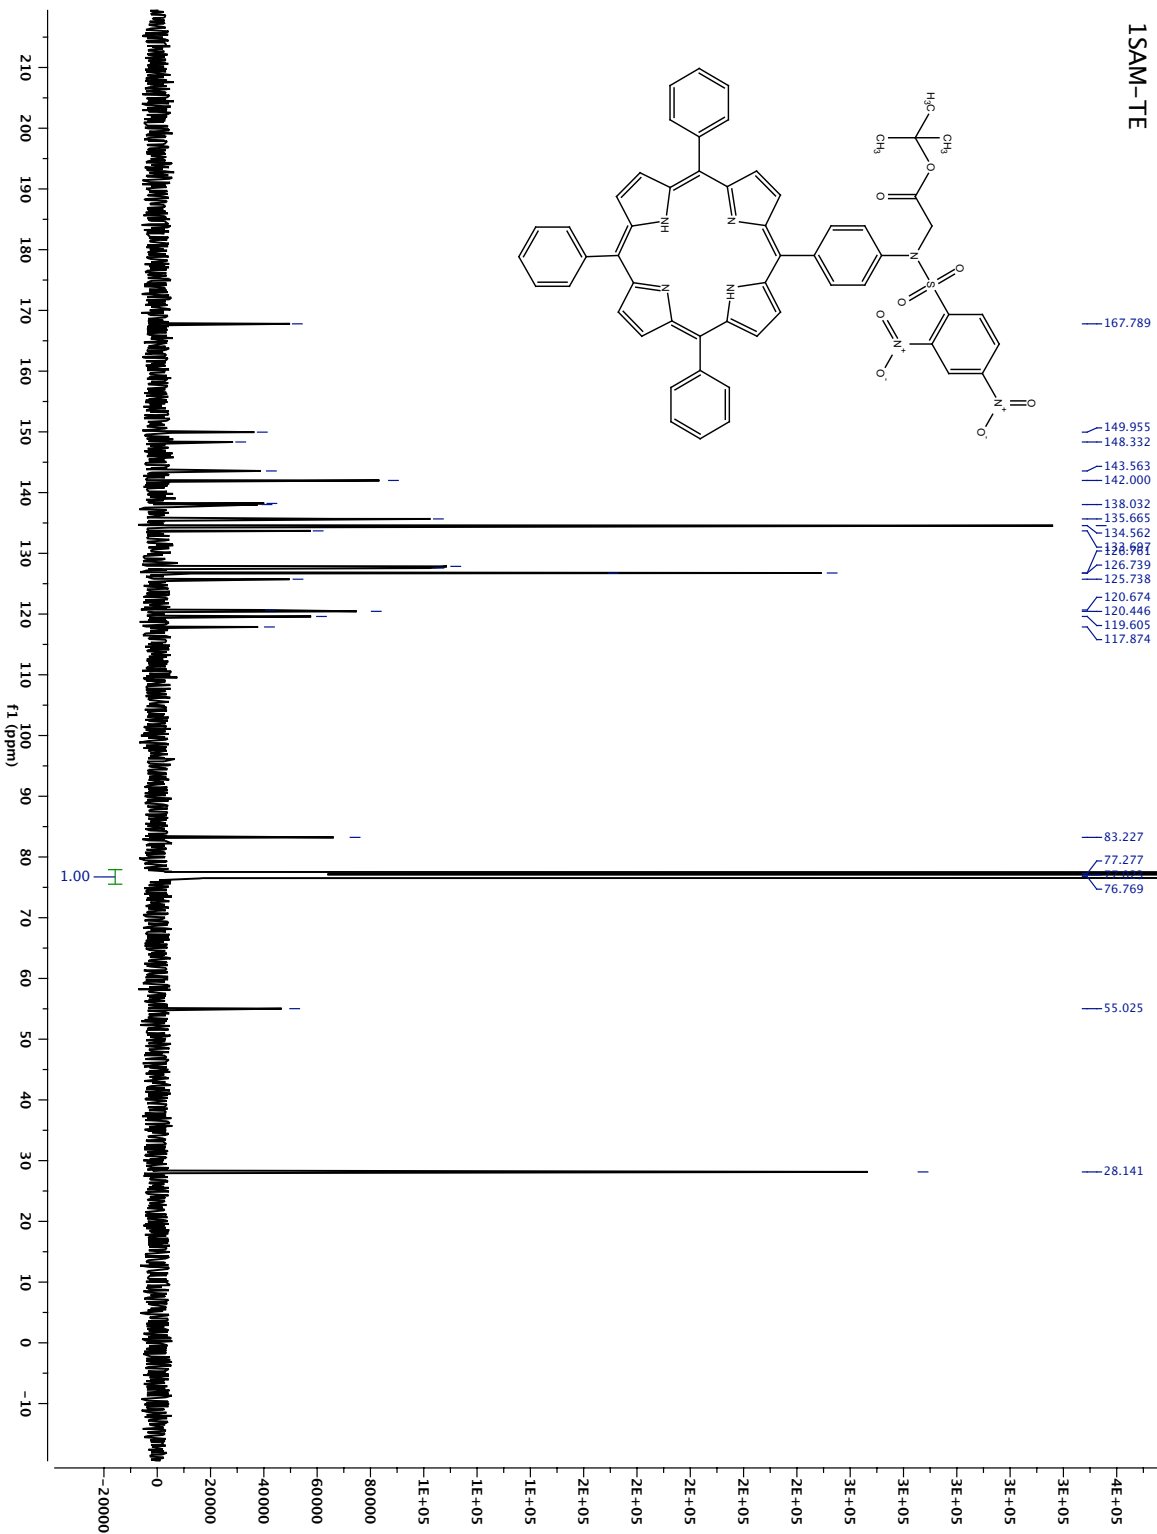

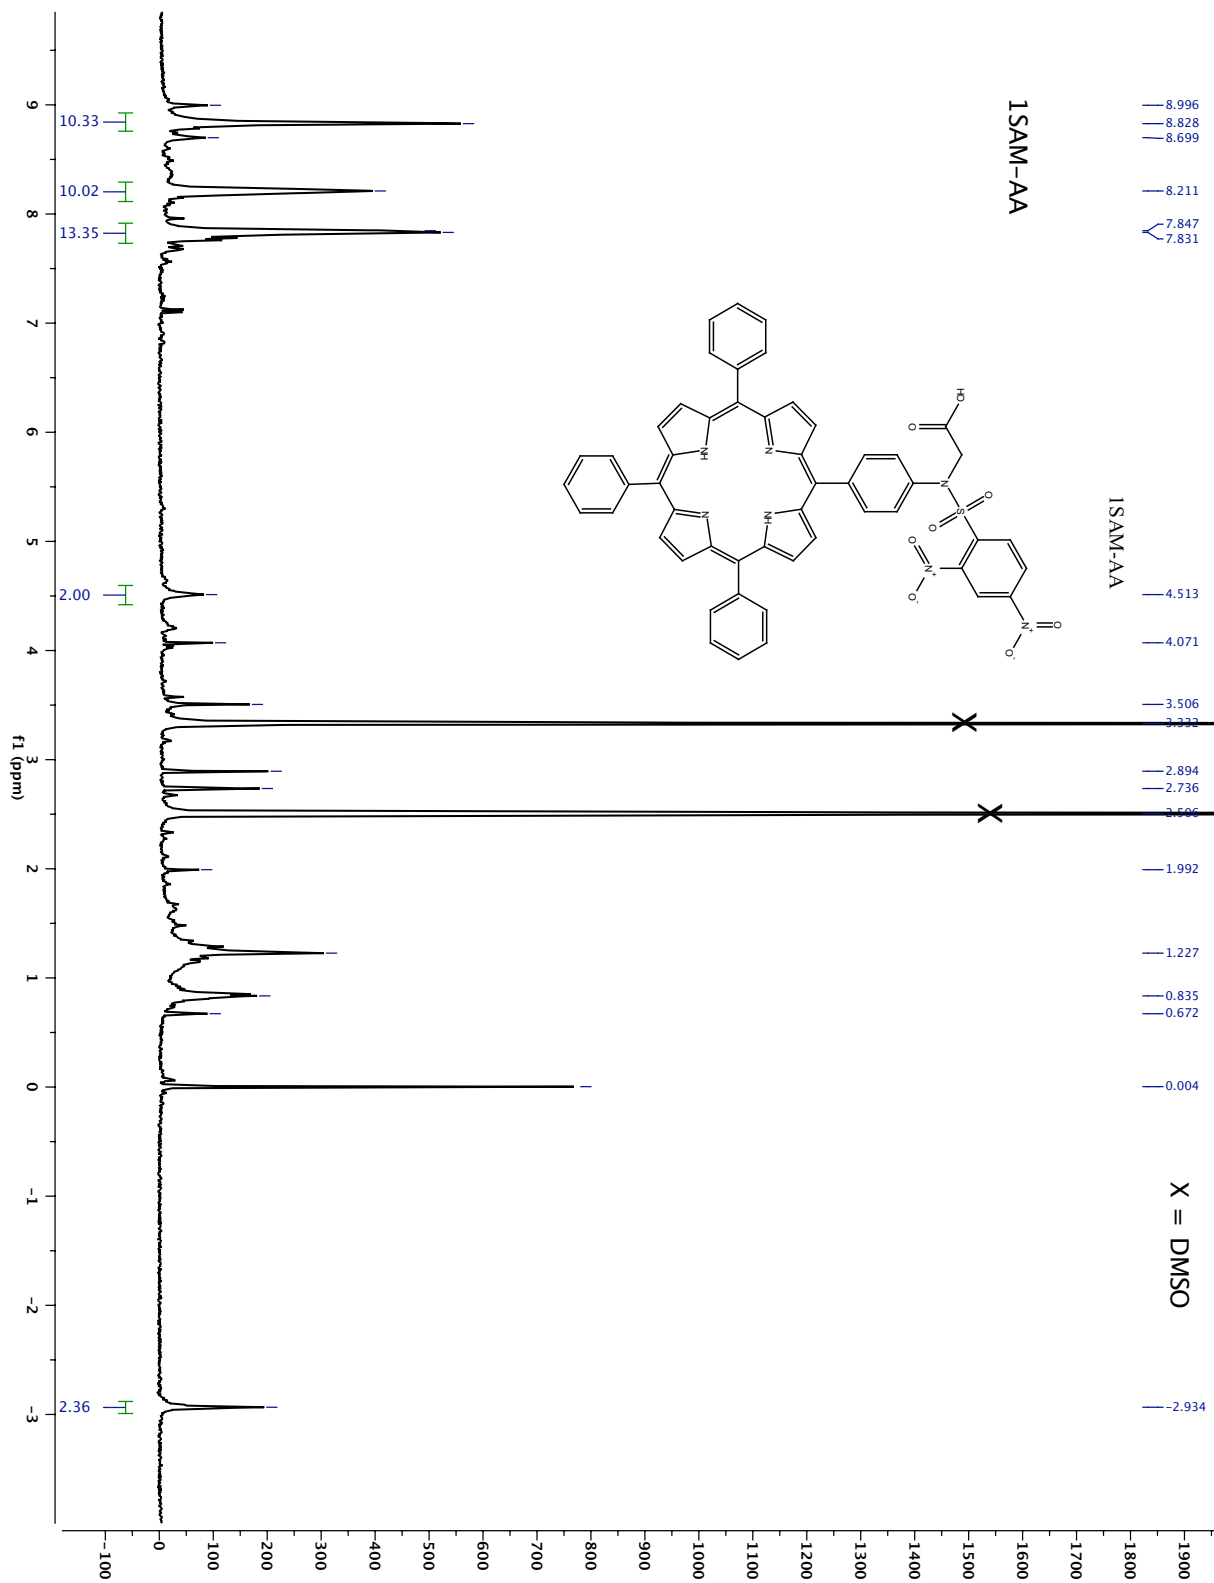

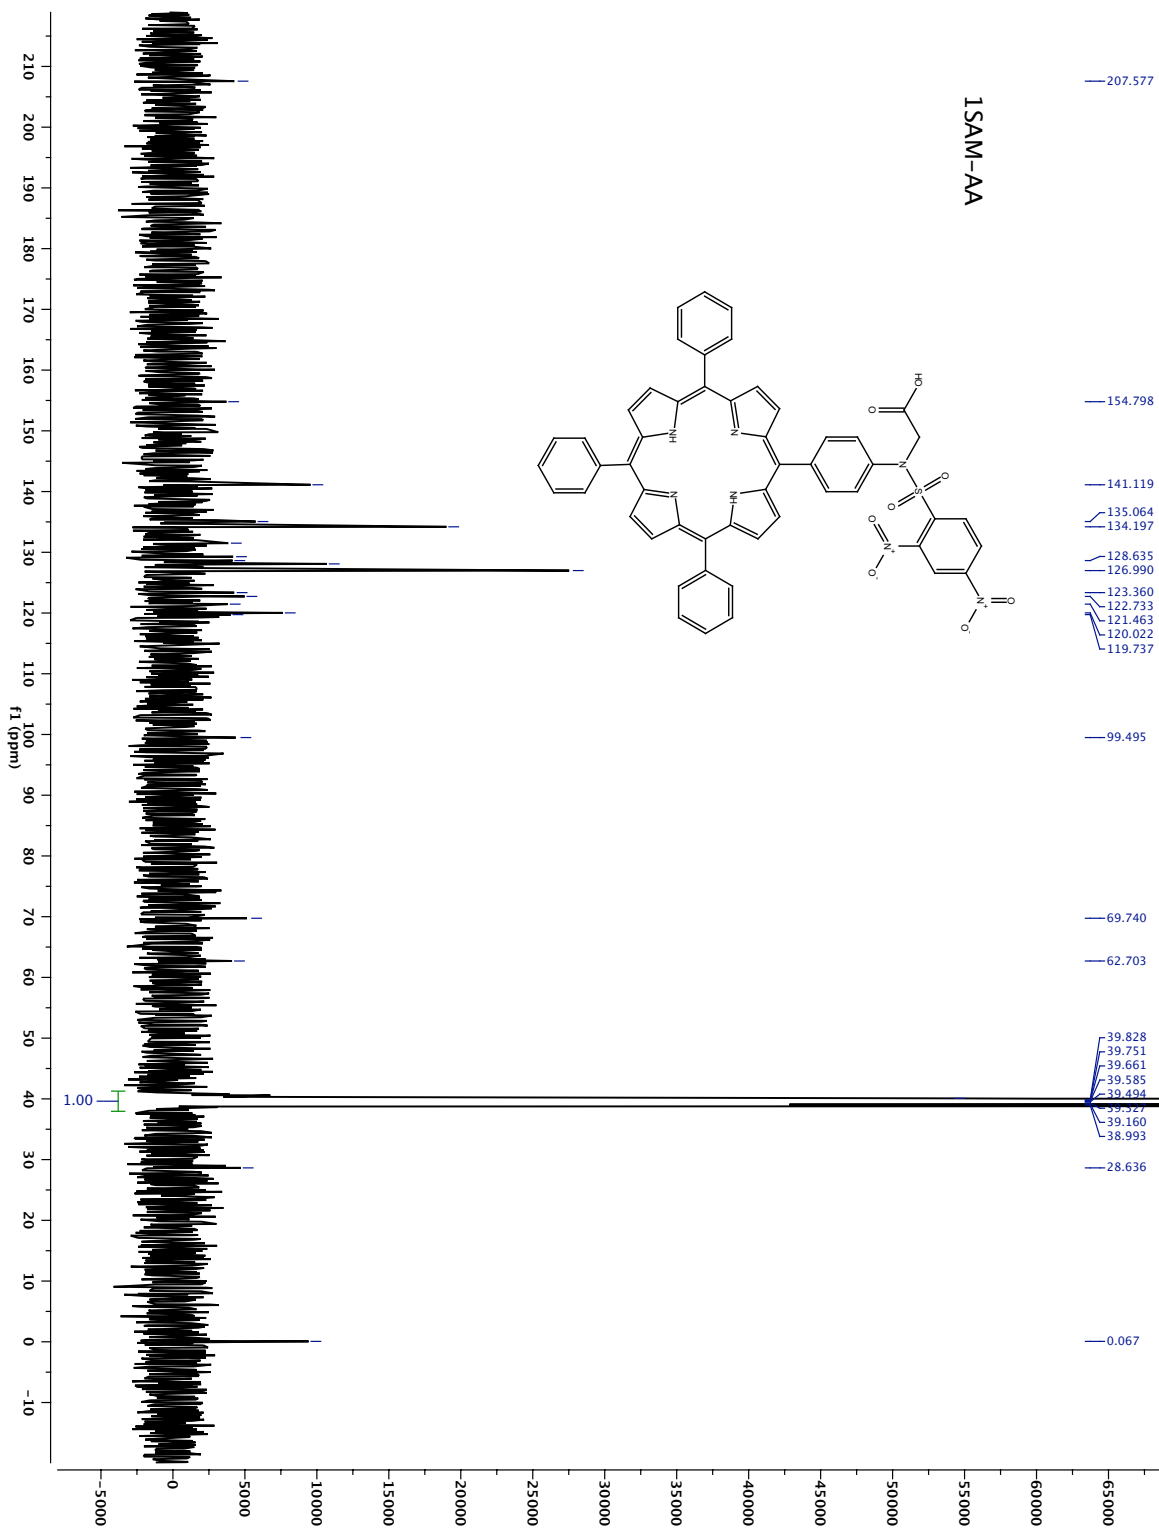

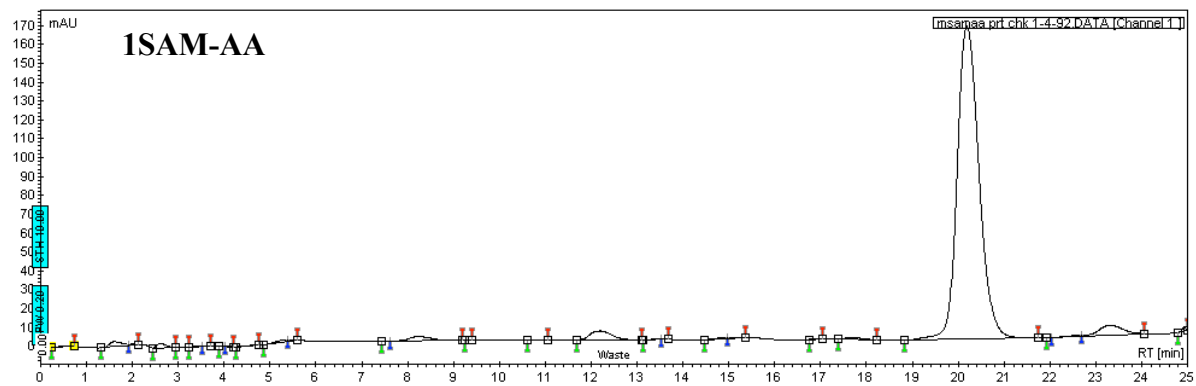

Gradient from 60% to 0% Buffer A

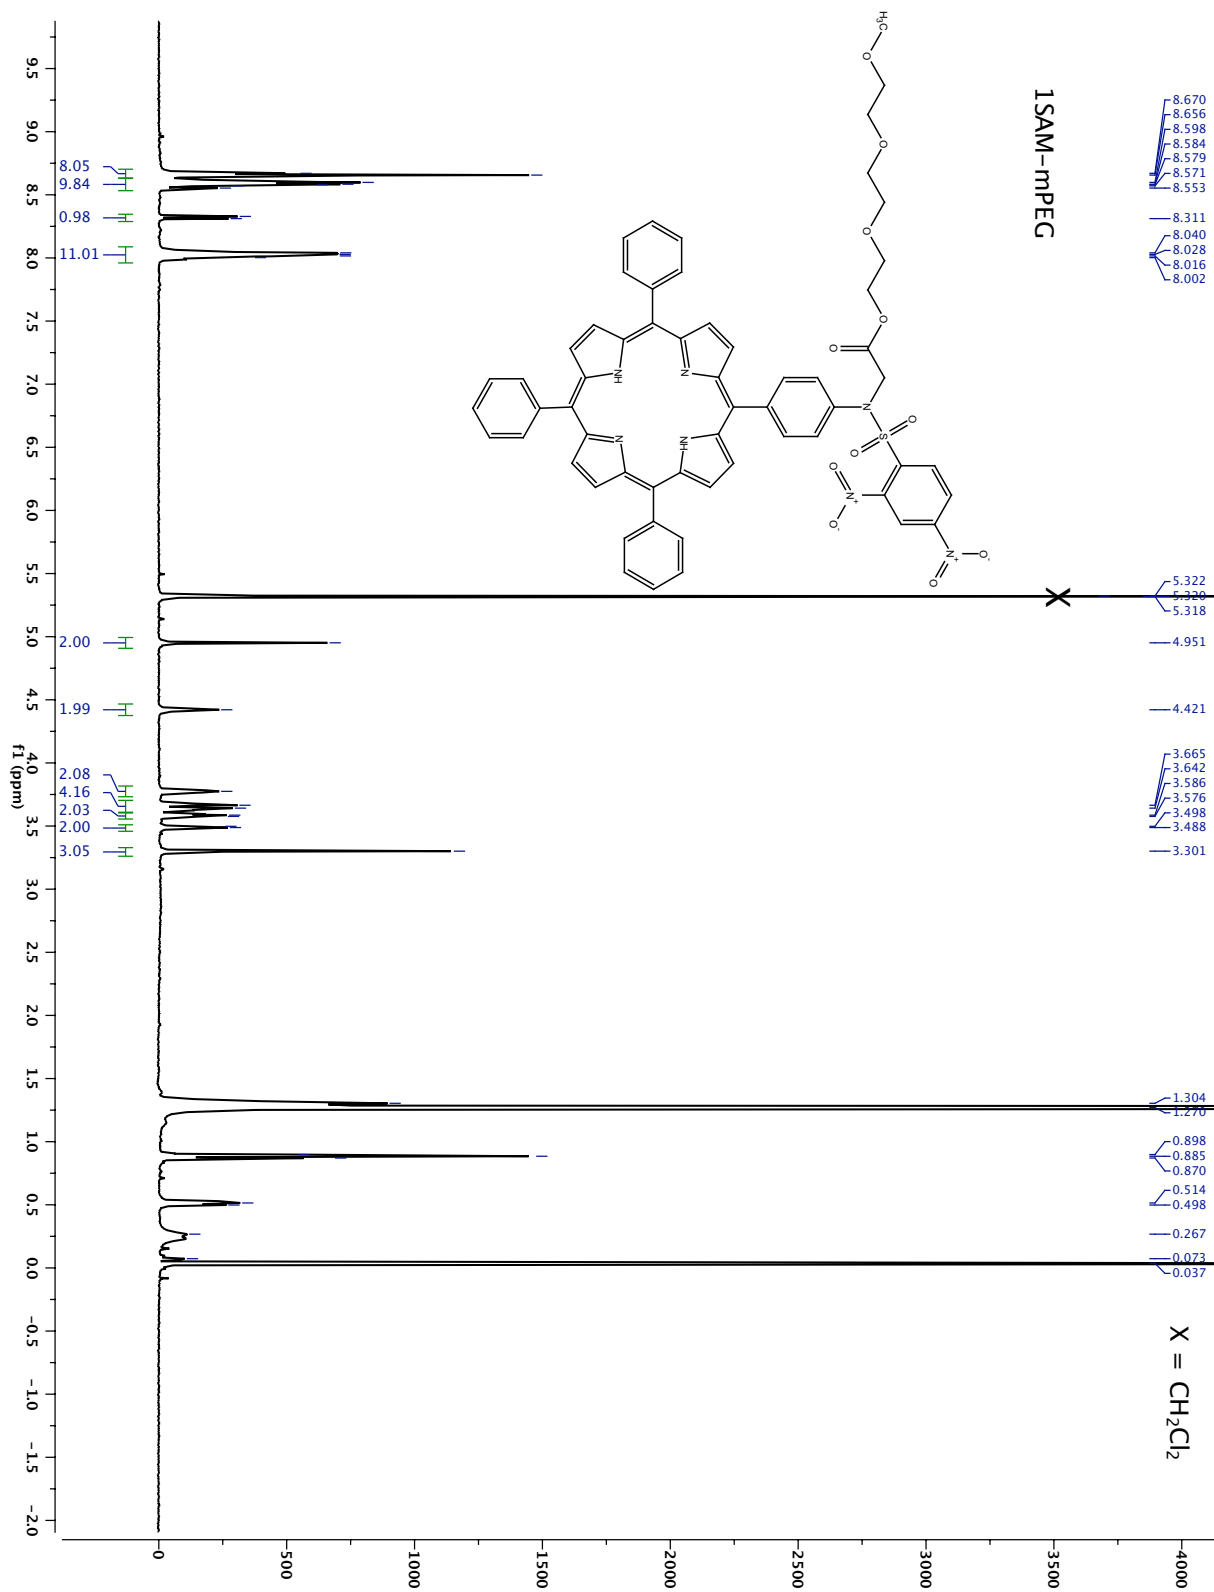

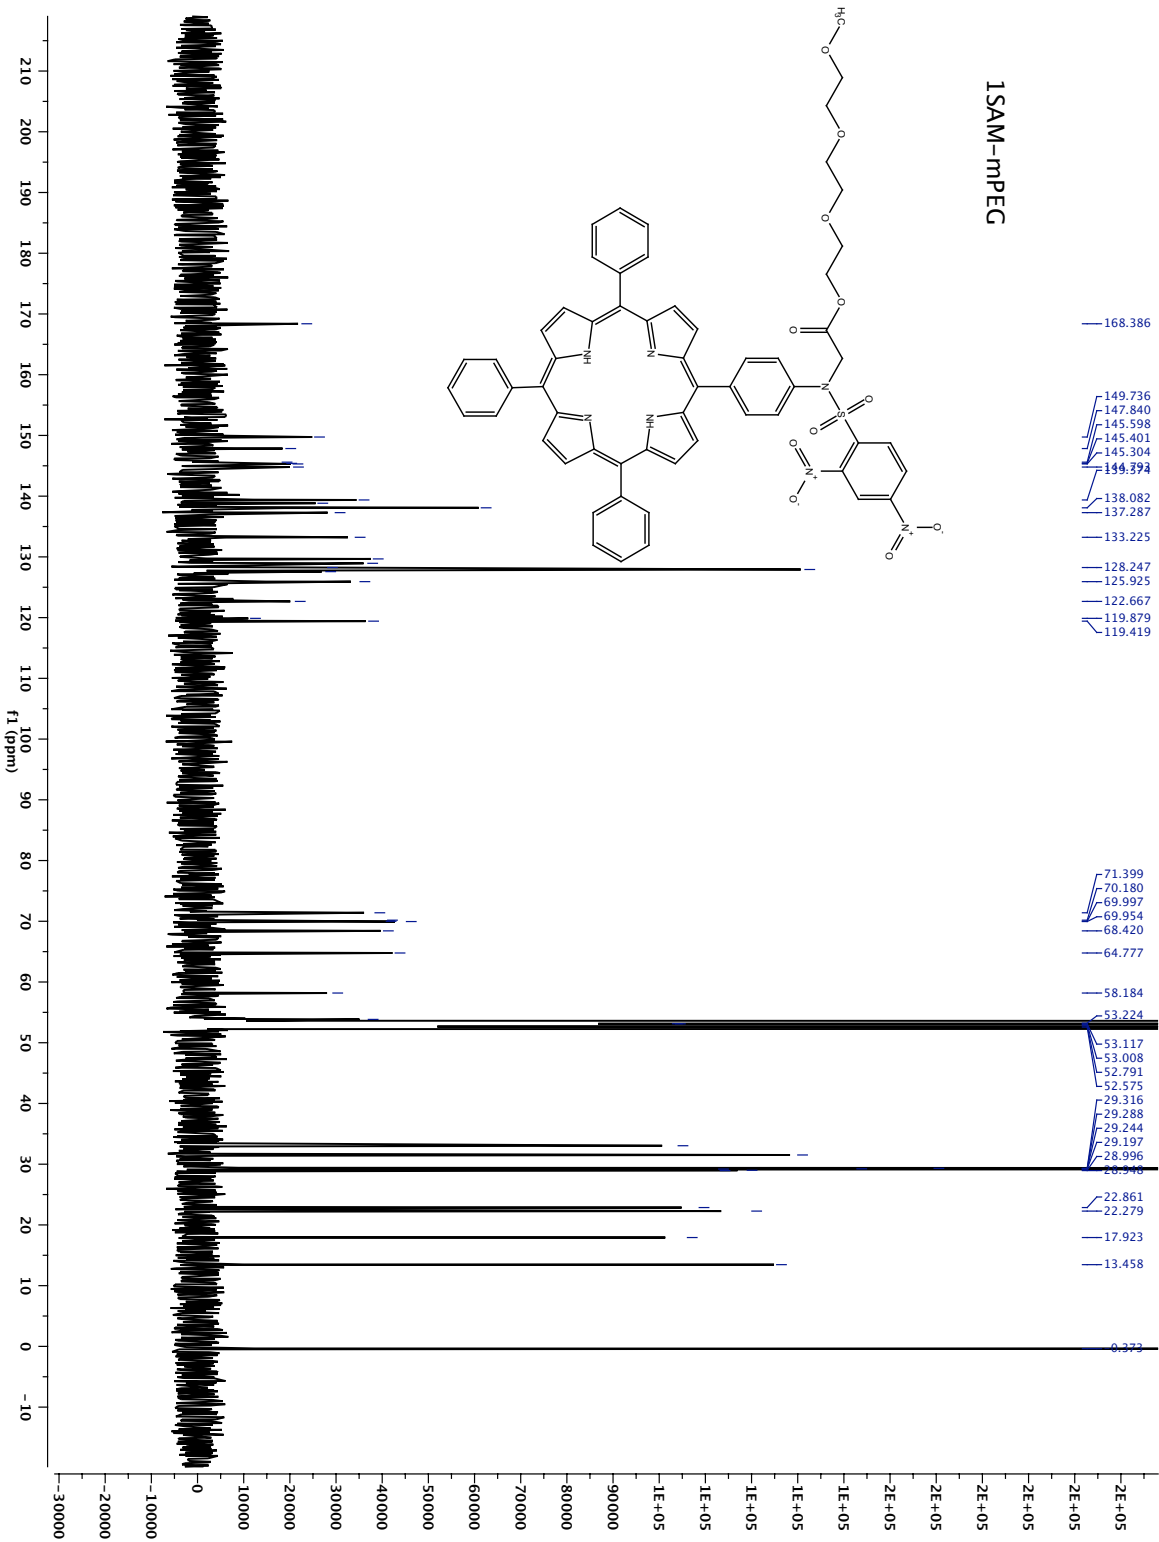

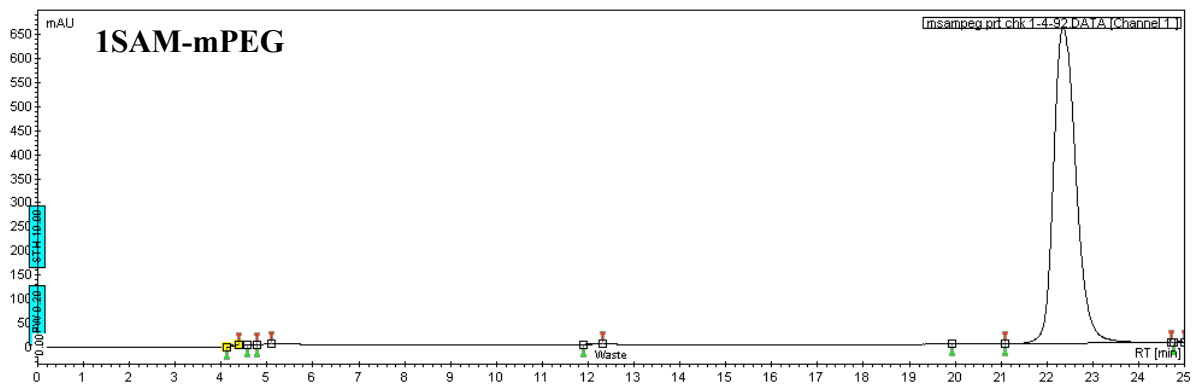

Gradient from 60% to 0% Buffer A

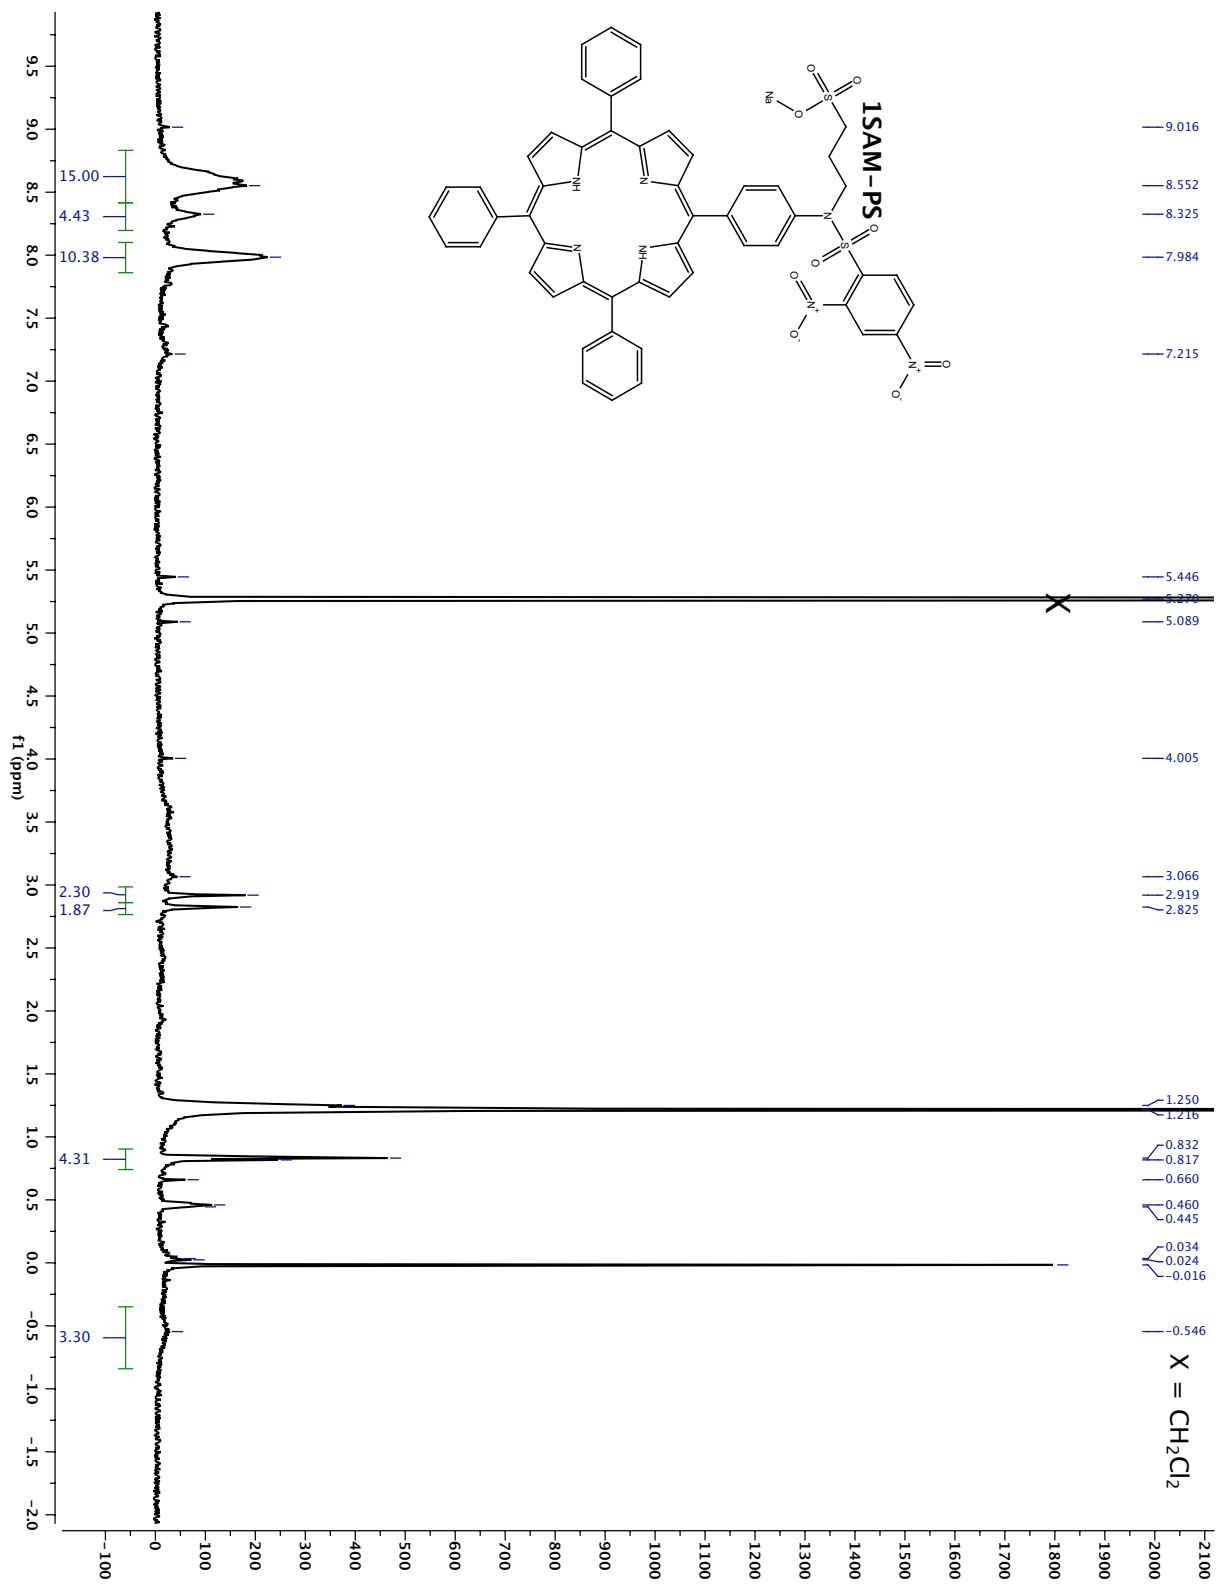



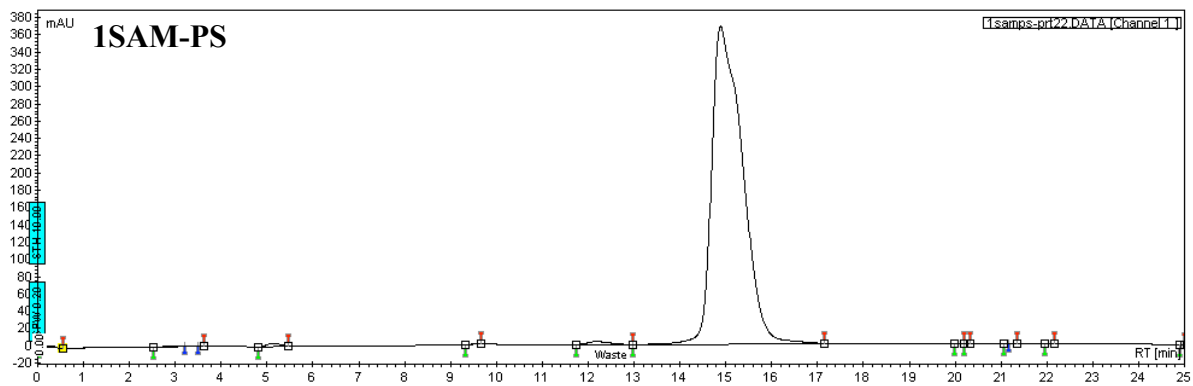

Gradient from 60% to 0% Buffer A

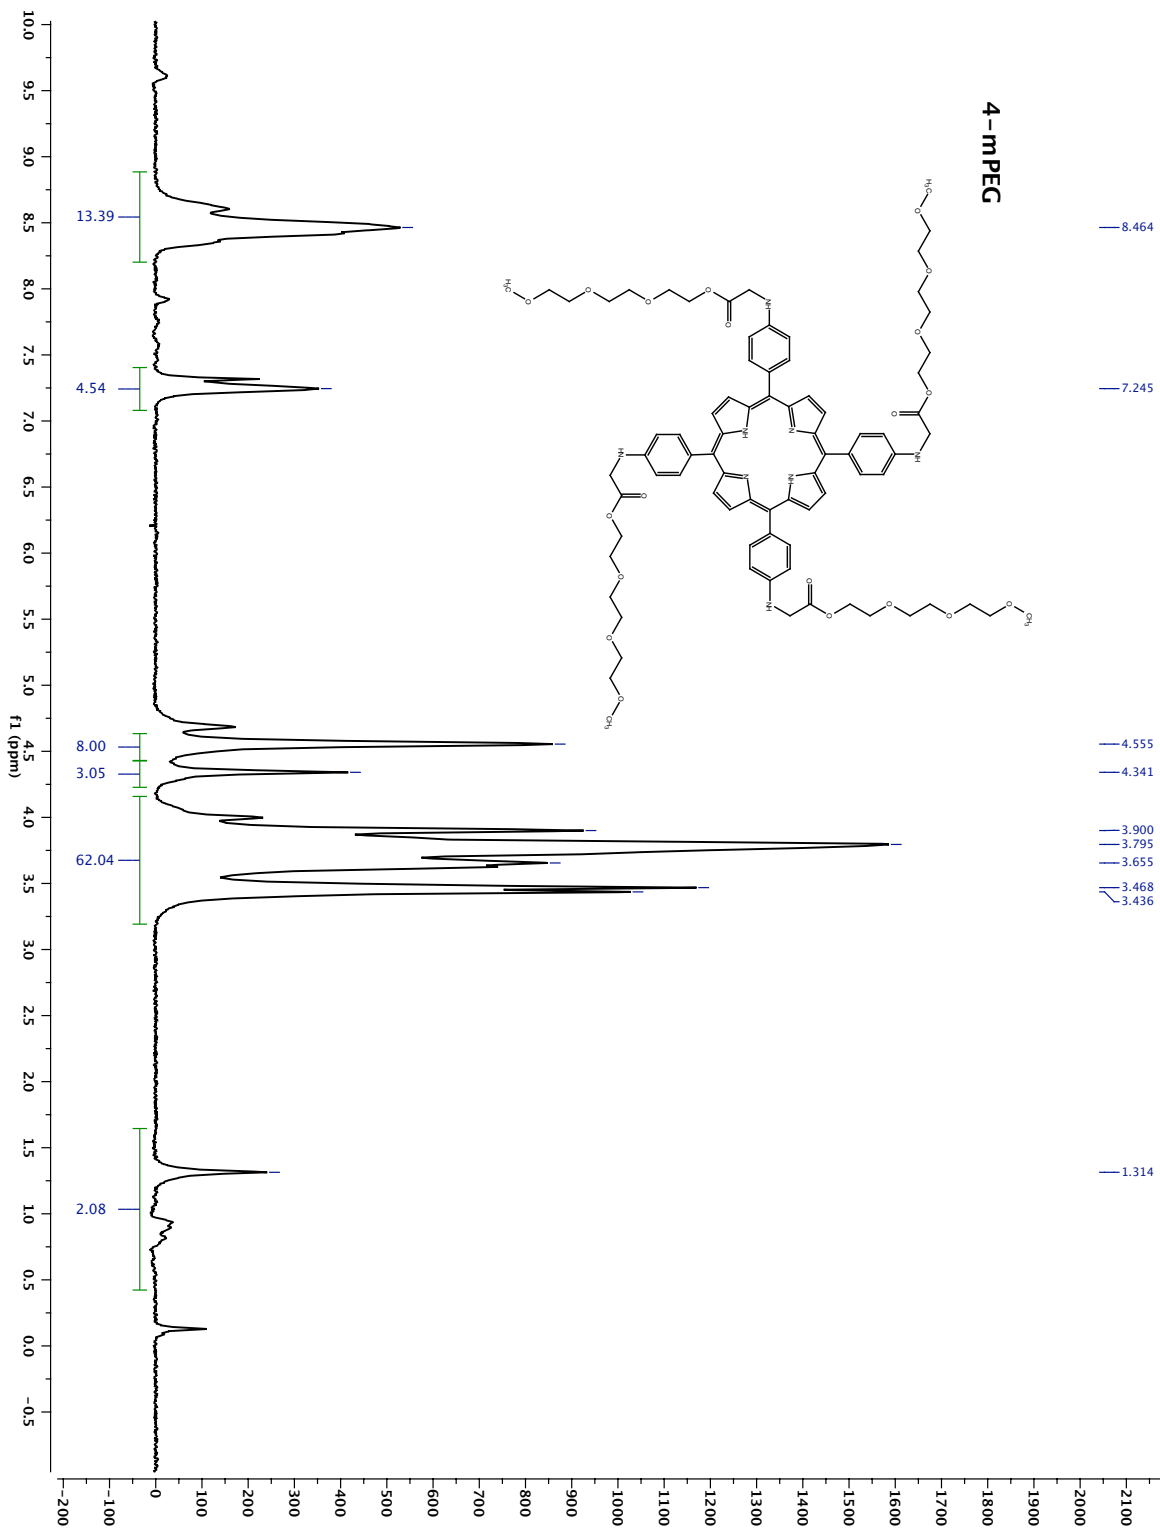

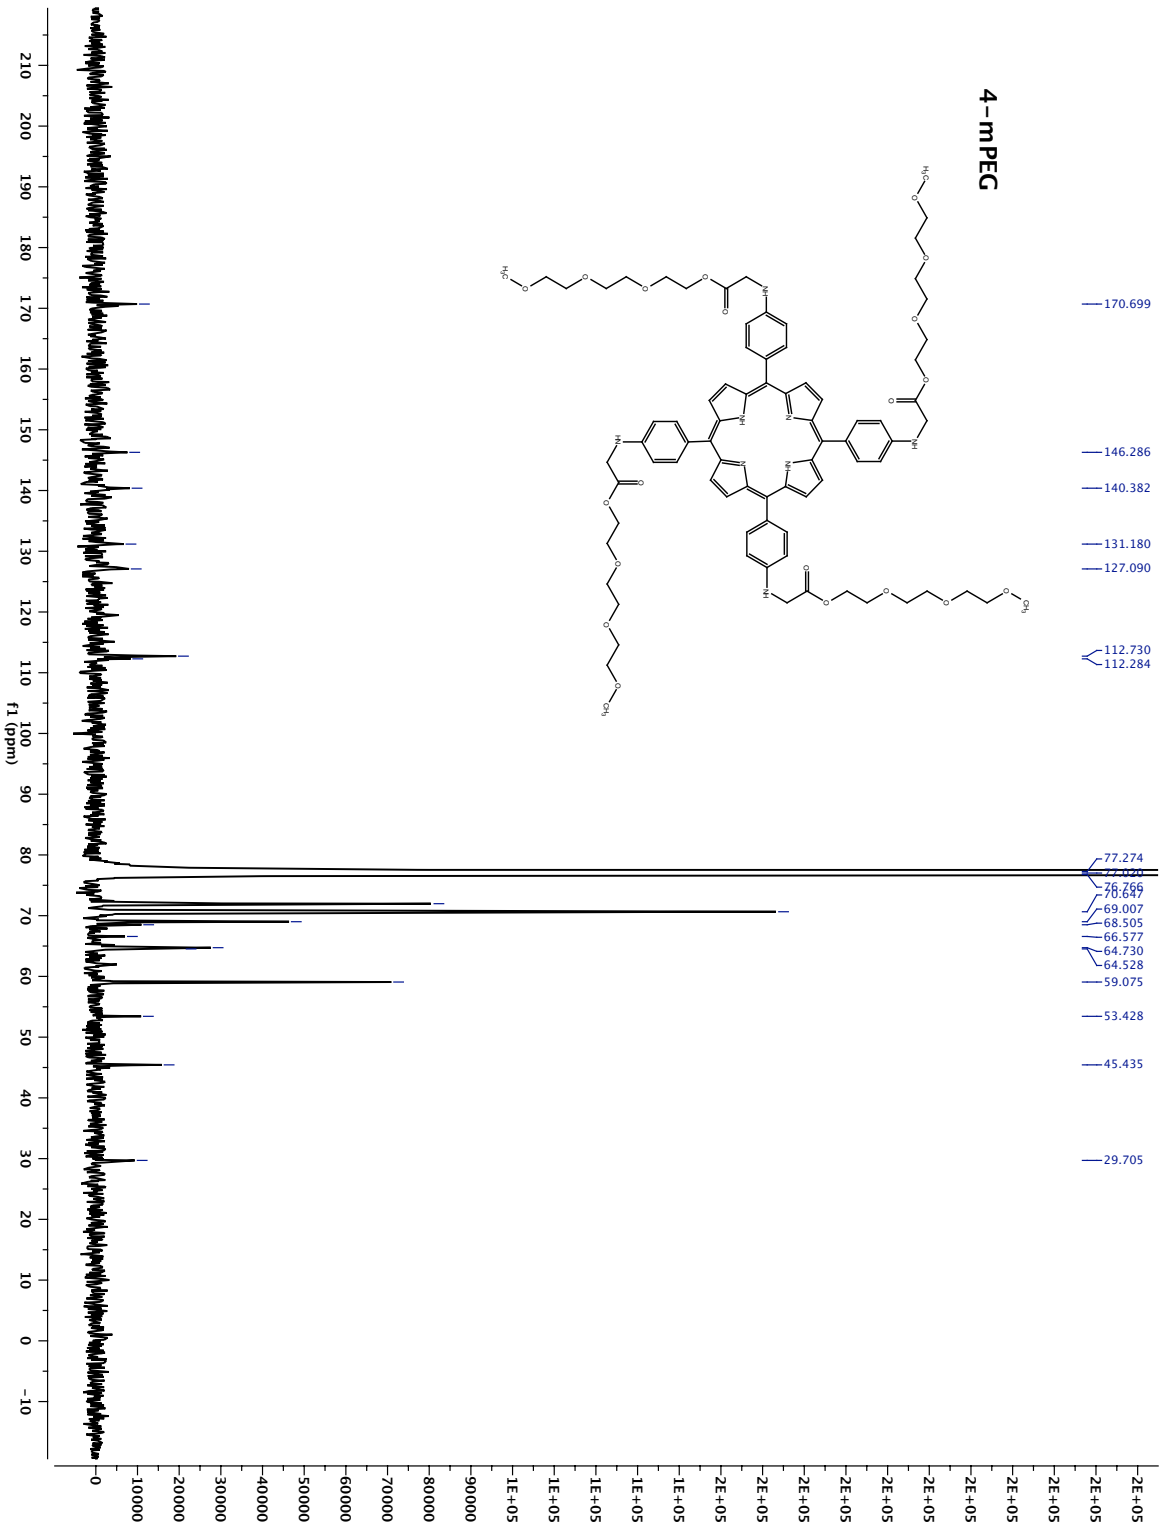

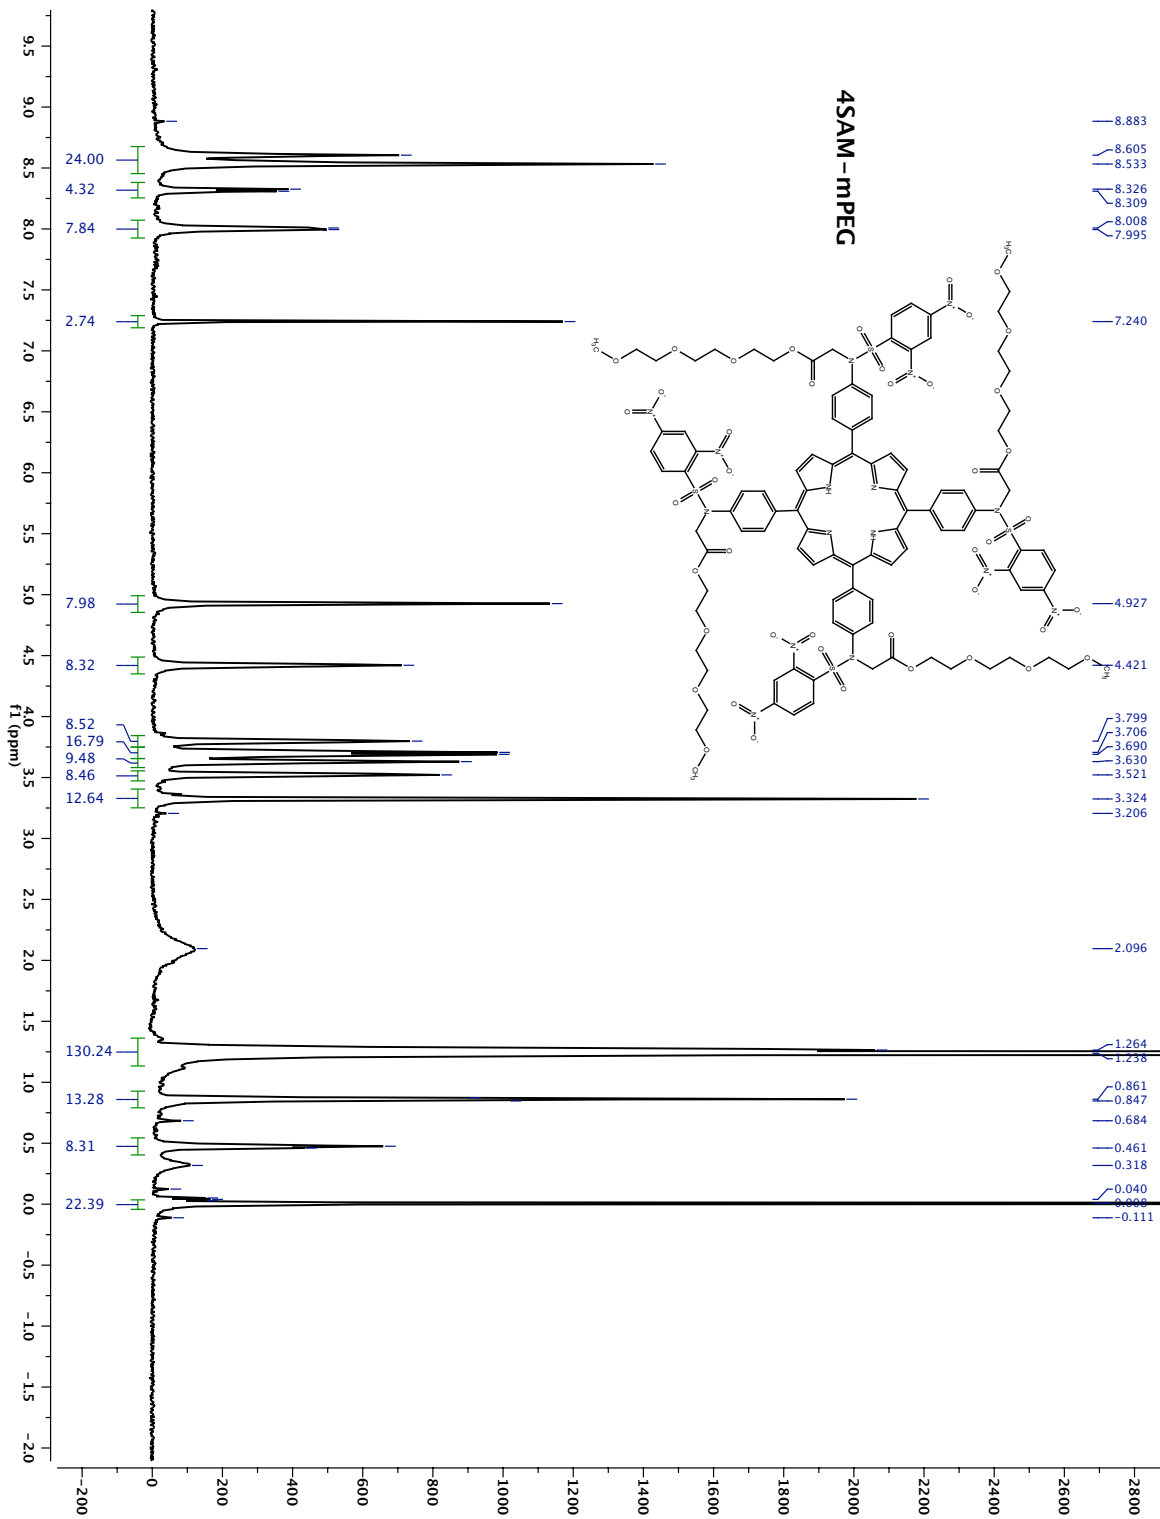

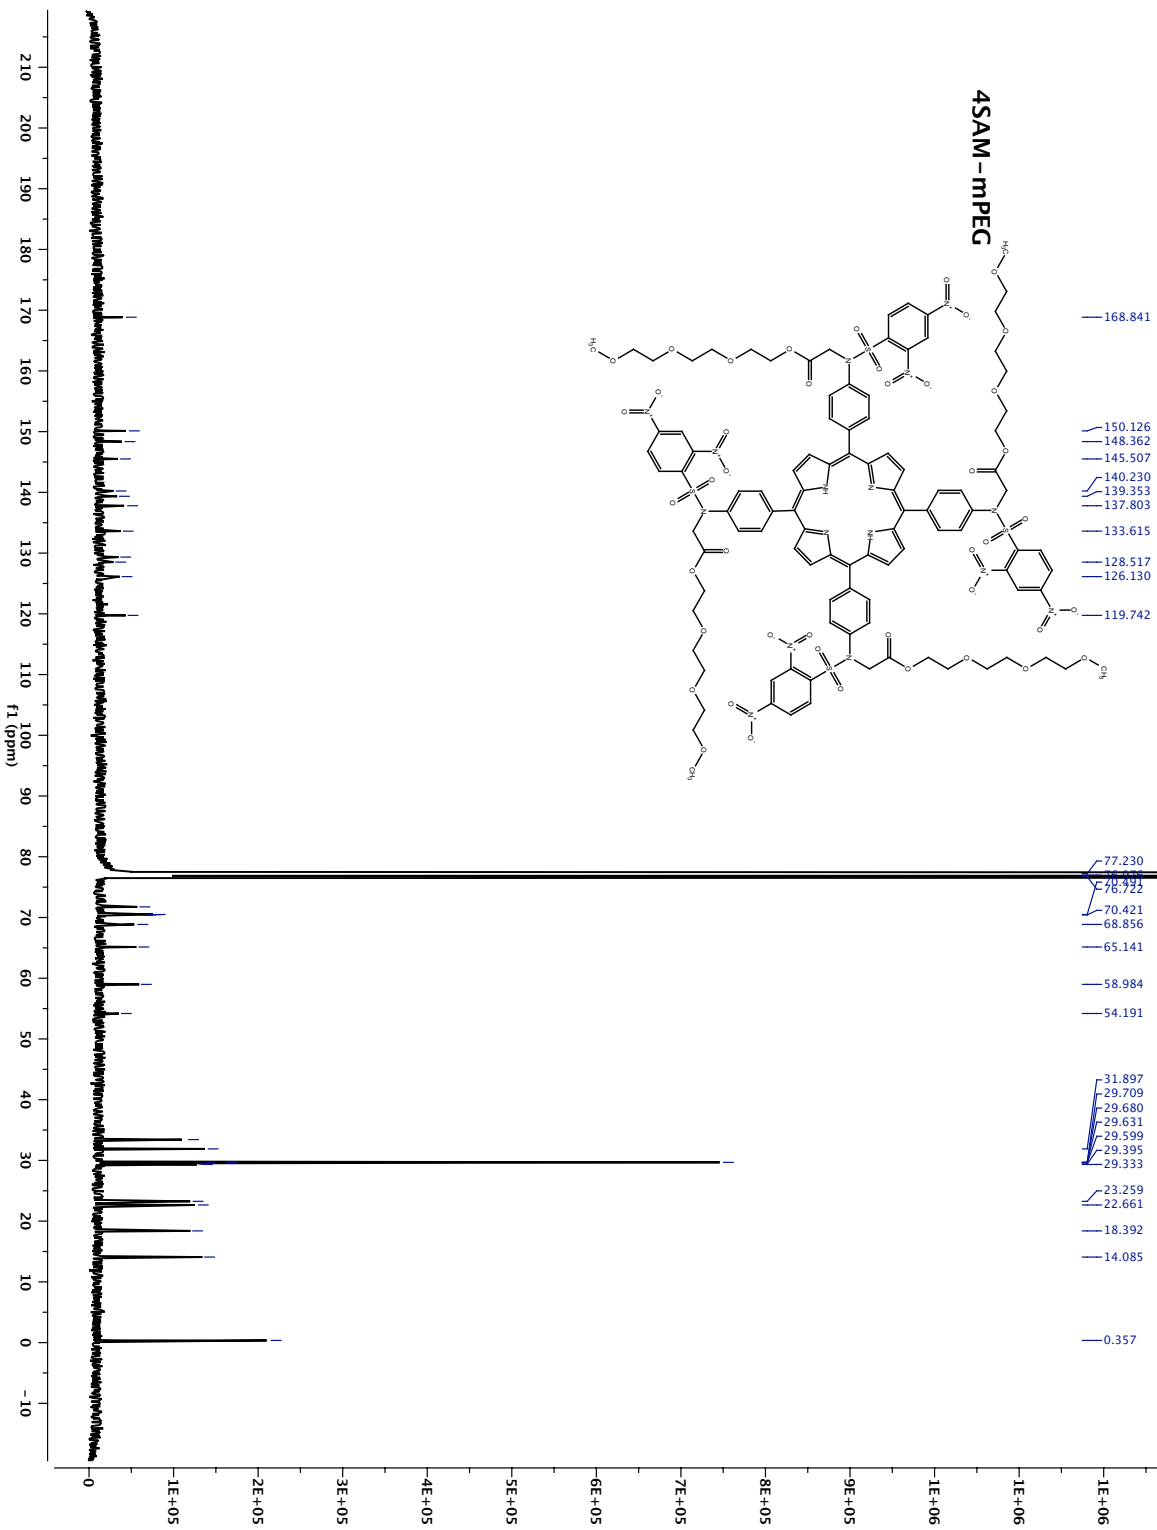

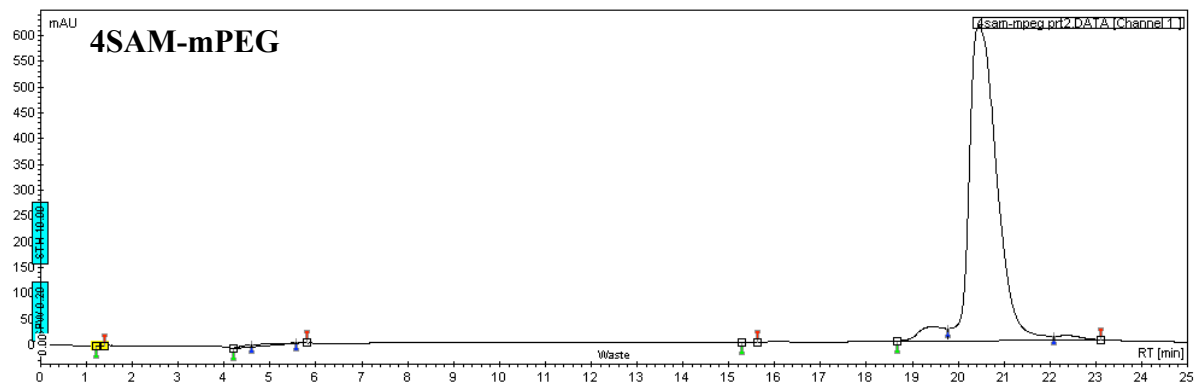

Gradient from 60% to 0% Buffer A

## REFERENCES

- (1) Dal Pozzo, A.; Acquasaliente, M.; Donzelli, G.; Delor, F.; Ferruti, P. *Farmaco [Sci]* **1986**, *41*, 622-629.
- (2) Luguya, R.; Jaquinod, L.; Fronczek, F. R.; Vicente, M. G. H.; Smith, K. M. *Tetrahedron* **2004**, *60*, 2757-2763.
- (3) Yuasa, M.; Oyaizu, K.; Yamaguchi, A.; Kuwakado, M. *J. Am. Chem. Soc.* **2004**, *126*, 11128-11129.
- (4) Adler, A. D.; Longo, F. R.; Finarelli, J. D.; Goldmacher, J.; Assour, J.; Korsakoff, L. *J. Org. Chem.* **1967**, *32*, 476-477.
- (5) McCarthy, J. R.; Perez, J. M.; Bruckner, C.; Weissleder, R. *Nano Lett* **2005**, *5*, 2552-2556.
